# Supplementary material
Source: PubMed Central journal article supplement (PMC2765067)
Supplement: legends.pdf [file legends.pdf]

1 **SUPPLEMENTAL FIGURES**

2 **Figure A. Cellular morphology.** Inverted phase contrast microscopy of cultured EC showing similar  
3 morphology of all three cell types grown to confluence under identical culture conditions.

4 **Figure B.** Heat map and gene names of all 253 transcripts determined by partition clustering to be most  
5 highly expressed in cavernosal EC.

6

7 **SUPPLEMENTAL TABLES (Attached as separate files):**

8 Table A: Characteristics of the human cavernosal tissue donors.

9 Table B: Complete list of genes highly expressed highly only in HCCEC.

10 Table C: Complete list of tight junction genes on array and relative expression.

11 Table D: GEO Repository entries for Claudin 11 in human endothelial cells (Accessioned 7/30/2008).

12
