# Supplementary material
Source: PubMed Central journal article supplement (PMC2765067)
Supplement: tableS1.pdf [file tableS1.pdf]

Supplemental Table 1. Relative Gene Expression Data comparing *Ddr2*<sup>slie/slie</sup> mutant vs. wildtype whole ovaries

| Affy Probe   | Change Log Ratio | Gene Symbol     |
|--------------|------------------|-----------------|
| 1456081_a_at | 0.2              | <i>Aacs</i>     |
| 1423797_at   | 0.5              | <i>Aacs</i>     |
| 1434528_at   | 0.4              | <i>Aard</i>     |
| 1423685_at   | 0.3              | <i>Aars</i>     |
| 1419824_a_at | -0.8             | <i>Aasdh</i>    |
| 1450724_at   | -0.9             | <i>AB030242</i> |
| 1421839_at   | 0.4              | <i>Abca1</i>    |
| 1421840_at   | 0.8              | <i>Abca1</i>    |
| 1452233_at   | 0.6              | <i>Abcc1</i>    |
| 1435751_at   | -0.4             | <i>Abcc9</i>    |
| 1442071_at   | -1.5             | <i>Abce1</i>    |
| 1451326_at   | -1.3             | <i>Abhd14b</i>  |
| 1418661_at   | 1.3              | <i>Abhd2</i>    |
| 1416315_at   | -0.5             | <i>Abhd4</i>    |
| 1439259_x_at | -0.5             | <i>Abhd4</i>    |
| 1417566_at   | 0.6              | <i>Abhd5</i>    |
| 1427054_s_at | 0.8              | <i>Abi3bp</i>   |
| 1454708_at   | -0.9             | <i>Ablim1</i>   |
| 1455061_a_at | -0.6             | <i>Acaa2</i>    |
| 1434185_at   | 0.6              | <i>Acaca</i>    |
| 1433545_s_at | -0.8             | <i>Acad11</i>   |
| 1419262_at   | -0.4             | <i>Acad8</i>    |
| 1428236_at   | -0.7             | <i>Acbd5</i>    |
| 1416568_a_at | -0.8             | <i>Acin1</i>    |
| 1439459_x_at | 0.1              | <i>Acly</i>     |
| 1451666_at   | 0.2              | <i>Acly</i>     |
| 1450643_s_at | 0.4              | <i>Acsl1</i>    |
| 1423883_at   | 0.5              | <i>Acsl1</i>    |
| 1418911_s_at | -0.6             | <i>Acsl4</i>    |
| 1422478_a_at | -0.9             | <i>Acss2</i>    |
| 1422479_at   | -0.8             | <i>Acss2</i>    |
| 1422340_a_at | 0.5              | <i>Actg2</i>    |
| 1423449_a_at | 0.2              | <i>Actn4</i>    |
| 1452051_at   | 0.2              | <i>Actr3</i>    |
| 1433725_at   | 0.4              | <i>Acvr1b</i>   |
| 1437382_at   | -0.6             | <i>Acvr2a</i>   |
| 1417976_at   | -0.8             | <i>Ada</i>      |
| 1450716_at   | 0.8              | <i>Adamts1</i>  |
| 1452595_at   | 0.9              | <i>Adamts4</i>  |
| 1455965_at   | 0.9              | <i>Adamts4</i>  |
| 1430352_at   | 0.5              | <i>Adamts9</i>  |
| 1437785_at   | 0.5              | <i>Adamts9</i>  |
| 1451932_a_at | -0.6             | <i>Adamts14</i> |
| 1418128_at   | -0.5             | <i>Adcy6</i>    |
| 1418586_at   | -0.8             | <i>Adcy9</i>    |

|              |      |                  |
|--------------|------|------------------|
| 1419811_at   | -0.8 | <i>Adcy9</i>     |
| 1449620_s_at | -0.8 | <i>Adcy9</i>     |
| 1434454_at   | -0.6 | <i>Adcy9</i>     |
| 1441778_at   | 0.2  | <i>Adcyap1</i>   |
| 1429022_at   | 0.7  | <i>Adcyap1r1</i> |
| 1448318_at   | 0.2  | <i>Adfp</i>      |
| 1416225_at   | 0.7  | <i>Adh1</i>      |
| 1421058_at   | 0.9  | <i>Adh7</i>      |
| 1422651_at   | 3.7  | <i>Adipoq</i>    |
| 1438292_x_at | -0.5 | <i>Adk</i>       |
| 1447839_x_at | -1.2 | <i>Adm</i>       |
| 1416077_at   | -1.1 | <i>Adm</i>       |
| 1422514_at   | -0.5 | <i>Aebp1</i>     |
| 1450637_a_at | -0.5 | <i>Aebp1</i>     |
| 1420619_a_at | -0.5 | <i>Aes</i>       |
| 1454727_at   | -0.7 | <i>Afap111</i>   |
| 1455833_at   | -1   | <i>Afap112</i>   |
| 1436870_s_at | -0.6 | <i>Afap112</i>   |
| 1420912_at   | -1.1 | <i>Aff4</i>      |
| 1434665_at   | -0.7 | <i>Aga</i>       |
| 1428821_at   | 0.4  | <i>Agpat2</i>    |
| 1417125_at   | 0.3  | <i>Ahcy</i>      |
| 1455177_at   | 0.7  | <i>Ahi1</i>      |
| 1422631_at   | 0.4  | <i>Ahr</i>       |
| 1457042_at   | -0.7 | <i>AI256396</i>  |
| 1442075_at   | -2.9 | <i>AI314604</i>  |
| 1455429_at   | -0.4 | <i>AI450540</i>  |
| 1437176_at   | 1.9  | <i>AI451557</i>  |
| 1435280_at   | 0.6  | <i>AI452195</i>  |
| 1433465_a_at | -0.5 | <i>AI467606</i>  |
| 1433914_at   | -0.5 | <i>AI747699</i>  |
| 1423718_at   | -0.6 | <i>Ak3</i>       |
| 1423717_at   | -0.5 | <i>Ak3</i>       |
| 1443923_at   | -0.9 | <i>Akap13</i>    |
| 1433722_at   | -0.4 | <i>Akap13</i>    |
| 1417734_at   | -0.8 | <i>Akap8l</i>    |
| 1448319_at   | 0.2  | <i>Akr1b3</i>    |
| 1423556_at   | 2.2  | <i>Akr1b7</i>    |
| 1448894_at   | 0.8  | <i>Akr1b8</i>    |
| 1418979_at   | -0.6 | <i>Akr1c14</i>   |
| 1419136_at   | -1.7 | <i>Akr1c18</i>   |
| 1437767_s_at | -0.9 | <i>Aktip</i>     |
| 1455282_x_at | 1.1  | <i>Alas1</i>     |
| 1424126_at   | 1.3  | <i>Alas1</i>     |
| 1426300_at   | 0.3  | <i>Alcam</i>     |
| 1426301_at   | 0.3  | <i>Alcam</i>     |
| 1437466_at   | 0.6  | <i>Alcam</i>     |

|              |      |                  |
|--------------|------|------------------|
| 1437325_x_at | 0.4  | <i>Aldh18a1</i>  |
| 1435855_x_at | 0.7  | <i>Aldh18a1</i>  |
| 1416468_at   | -0.4 | <i>Aldh1a1</i>   |
| 1436689_a_at | 0.2  | <i>Aldh9a1</i>   |
| 1416921_x_at | 0.2  | <i>Aldoa</i>     |
| 1434799_x_at | 0.3  | <i>Aldoa</i>     |
| 1419114_at   | -0.6 | <i>Alg14</i>     |
| 1452016_at   | 0.7  | <i>Alox5ap</i>   |
| 1423611_at   | 0.7  | <i>Alpl</i>      |
| 1435661_at   | -0.5 | <i>Als2cr4</i>   |
| 1448484_at   | 0.3  | <i>Amd1</i>      |
| 1450102_a_at | -0.5 | <i>Amfr</i>      |
| 1438936_s_at | 0.7  | <i>Ang</i>       |
| 1417130_s_at | 0.4  | <i>Angptl4</i>   |
| 1434265_s_at | -0.6 | <i>Ank2</i>      |
| 1425482_s_at | -0.5 | <i>Ankmy2</i>    |
| 1430668_a_at | -1   | <i>Ankra2</i>    |
| 1420992_at   | 1.1  | <i>Ankrd1</i>    |
| 1416065_a_at | -0.6 | <i>Ankrd10</i>   |
| 1435880_at   | -0.5 | <i>Ankrd50</i>   |
| 1417082_at   | 0.3  | <i>Anp32b</i>    |
| 1451356_at   | -0.4 | <i>Anp32e</i>    |
| 1426708_at   | -0.8 | <i>Antxr2</i>    |
| 1440261_at   | 0.3  | <i>Ap4e1</i>     |
| 1418382_at   | 0.4  | <i>Apcdd1</i>    |
| 1454822_x_at | 0.6  | <i>Apcdd1</i>    |
| 1437715_x_at | 0.3  | <i>Apex1</i>     |
| 1456079_x_at | 0.4  | <i>Apex1</i>     |
| 1415813_at   | 0.3  | <i>Api5</i>      |
| 1432344_a_at | -1.4 | <i>Aplp2</i>     |
| 1421889_a_at | -1.2 | <i>Aplp2</i>     |
| 1421888_x_at | -1   | <i>Aplp2</i>     |
| 1421887_a_at | -0.9 | <i>Aplp2</i>     |
| 1423739_x_at | -0.7 | <i>Aplp2</i>     |
| 1415727_at   | -0.5 | <i>Apoa1bp</i>   |
| 1451251_at   | 0.3  | <i>Appbp2</i>    |
| 1434040_at   | 0.4  | <i>Appbp2</i>    |
| 1426743_at   | -0.3 | <i>Appl2</i>     |
| 1455647_at   | -0.5 | <i>Ar</i>        |
| 1428607_at   | -0.7 | <i>Araf</i>      |
| 1418822_a_at | 0.2  | <i>Arf6</i>      |
| 1418823_at   | 0.4  | <i>Arf6</i>      |
| 1415711_at   | -0.6 | <i>Arfgef1</i>   |
| 1433598_at   | -0.6 | <i>Arglu1</i>    |
| 1438434_at   | 0.7  | <i>Arhgap11a</i> |
| 1451525_at   | -0.8 | <i>Arhgap12</i>  |
| 1426623_a_at | -0.5 | <i>Arhgap17</i>  |

|              |      |                 |
|--------------|------|-----------------|
| 1428369_s_at | -0.5 | <i>Arhgap21</i> |
| 1434809_at   | 0.4  | <i>Arhgap28</i> |
| 1423194_at   | -1.4 | <i>Arhgap5</i>  |
| 1450896_at   | -0.5 | <i>Arhgap5</i>  |
| 1450897_at   | -0.4 | <i>Arhgap5</i>  |
| 1451168_a_at | 0.2  | <i>Arhgdia</i>  |
| 1426454_at   | 0.9  | <i>Arhgdib</i>  |
| 1433642_at   | -0.3 | <i>Arl15</i>    |
| 1435092_at   | 1    | <i>Arl4a</i>    |
| 1433951_at   | 0.4  | <i>Arl5a</i>    |
| 1425914_a_at | -0.8 | <i>Armex1</i>   |
| 1460359_at   | -0.4 | <i>Armex3</i>   |
| 1428112_at   | 0.2  | <i>Armet</i>    |
| 1434028_at   | -0.3 | <i>Arnt2</i>    |
| 1437148_at   | 0.2  | <i>Arpc2</i>    |
| 1422608_at   | 0.2  | <i>Arpp19</i>   |
| 1427508_at   | 0.4  | <i>Arsi</i>     |
| 1423422_at   | 0.8  | <i>Asb4</i>     |
| 1433919_at   | 1.1  | <i>Asb4</i>     |
| 1420985_at   | -0.4 | <i>Ash11</i>    |
| 1451095_at   | 0.2  | <i>Asns</i>     |
| 1448421_s_at | -1.4 | <i>Aspn</i>     |
| 1416652_at   | -1.2 | <i>Aspn</i>     |
| 1438178_x_at | 0.3  | <i>Atad3a</i>   |
| 1456541_x_at | 0.4  | <i>Atad3a</i>   |
| 1437343_x_at | 0.5  | <i>Atad3a</i>   |
| 1435173_at   | 0.2  | <i>Ate1</i>     |
| 1426583_at   | -0.4 | <i>Atf2</i>     |
| 1452116_s_at | -0.4 | <i>Atf2</i>     |
| 1449475_at   | 0.7  | <i>Atp12a</i>   |
| 1443823_s_at | 0.6  | <i>Atp1a2</i>   |
| 1427481_a_at | -1.8 | <i>Atp1a3</i>   |
| 1427250_at   | 0.3  | <i>Atp2a2</i>   |
| 1423662_at   | -0.5 | <i>Atp6ap2</i>  |
| 1448211_at   | -1.3 | <i>Atp6v0e2</i> |
| 1423597_at   | -1.5 | <i>Atp8a1</i>   |
| 1433827_at   | -1.1 | <i>Atp8a1</i>   |
| 1433965_at   | -0.6 | <i>Atp8a1</i>   |
| 1448770_a_at | -0.4 | <i>Atpif1</i>   |
| 1450051_at   | -1.2 | <i>Atrx</i>     |
| 1420948_s_at | -1   | <i>Atrx</i>     |
| 1434451_at   | -0.5 | <i>Atxn1</i>    |
| 1433663_s_at | 0.4  | <i>AU014645</i> |
| 1442194_at   | -1.4 | <i>AU018552</i> |
| 1433935_at   | -0.6 | <i>AU020206</i> |
| 1451246_s_at | 0.6  | <i>Aurkb</i>    |
| 1438035_at   | -0.9 | <i>AW061290</i> |

|              |      |                      |
|--------------|------|----------------------|
| 1438036_x_at | -0.8 | <i>AW061290</i>      |
| 1434372_at   | 1.5  | <i>AW112010</i>      |
| 1426459_s_at | -0.5 | <i>AW549877</i>      |
| 1433434_at   | 1.4  | <i>AW551984</i>      |
| 1423586_at   | 0.3  | <i>Axl</i>           |
| 1430984_at   | -1.4 | <i>Azin1</i>         |
| 1422702_at   | -0.5 | <i>Azin1</i>         |
| 1436240_at   | -0.7 | <i>B230214O09Rik</i> |
| 1424516_at   | -0.5 | <i>B230354K17Rik</i> |
| 1449289_a_at | 0.7  | <i>B2m</i>           |
| 1452428_a_at | 0.7  | <i>B2m</i>           |
| 1418736_at   | -0.4 | <i>B3galnt1</i>      |
| 1455033_at   | -0.7 | <i>B430201A12Rik</i> |
| 1438454_at   | -0.9 | <i>B430203M17Rik</i> |
| 1433617_s_at | 0.5  | <i>B4galt5</i>       |
| 1457791_at   | -1.7 | <i>B830008H07Rik</i> |
| 1421824_at   | -0.5 | <i>Bace1</i>         |
| 1455826_a_at | -0.5 | <i>Bace1</i>         |
| 1416673_at   | -2.2 | <i>Bace2</i>         |
| 1438645_x_at | -2.2 | <i>Bace2</i>         |
| 1437846_x_at | -1.9 | <i>Bace2</i>         |
| 1423948_at   | -0.8 | <i>Bag2</i>          |
| 1428572_at   | -0.4 | <i>Baspl</i>         |
| 1437984_x_at | 0.2  | <i>Bat1a</i>         |
| 1448221_at   | 0.2  | <i>Bat1a</i>         |
| 1455425_at   | -1   | <i>BB001228</i>      |
| 1436453_at   | 1.5  | <i>BB144871</i>      |
| 1445711_at   | -1.2 | <i>BB163080</i>      |
| 1455823_at   | -1   | <i>Bbs4</i>          |
| 1425323_a_at | -0.6 | <i>BC008155</i>      |
| 1425646_at   | -0.9 | <i>BC016495</i>      |
| 1425046_at   | -1   | <i>BC018465</i>      |
| 1451234_at   | -1   | <i>BC021381</i>      |
| 1451583_a_at | -1   | <i>BC025076</i>      |
| 1434075_at   | -0.7 | <i>BC030336</i>      |
| 1436033_at   | -0.6 | <i>BC031353</i>      |
| 1443935_at   | -0.5 | <i>BC032203</i>      |
| 1434929_at   | -0.9 | <i>BC035044</i>      |
| 1438349_at   | -0.7 | <i>BC043476</i>      |
| 1437696_at   | -0.5 | <i>BC049807</i>      |
| 1424729_at   | 1.7  | <i>BC054059</i>      |
| 1434202_a_at | 1.8  | <i>BC055107</i>      |
| 1454885_at   | -0.6 | <i>BC063263</i>      |
| 1456279_a_at | -0.5 | <i>Bcap31</i>        |
| 1455699_at   | -0.9 | <i>Bcat1</i>         |
| 1450871_a_at | -0.6 | <i>Bcat1</i>         |
| 1457072_at   | -0.7 | <i>Bcl11a</i>        |

|              |      |                      |
|--------------|------|----------------------|
| 1456005_a_at | -0.9 | <i>Bcl2l11</i>       |
| 1418133_at   | 0.7  | <i>Bcl3</i>          |
| 1428208_at   | -0.6 | <i>Bcl7a</i>         |
| 1452257_at   | -0.8 | <i>Bdh1</i>          |
| 1422168_a_at | 0.7  | <i>Bdnf</i>          |
| 1428209_at   | 0.4  | <i>Bex4</i>          |
| 1418025_at   | 0.6  | <i>Bhlhb2</i>        |
| 1450624_at   | -2.5 | <i>Bhmt</i>          |
| 1450732_a_at | -0.4 | <i>Bicd2</i>         |
| 1417691_at   | 0.4  | <i>Bin3</i>          |
| 1424278_a_at | 0.5  | <i>Birc5</i>         |
| 1423635_at   | -0.6 | <i>Bmp2</i>          |
| 1450759_at   | -0.5 | <i>Bmp6</i>          |
| 1429273_at   | 0.3  | <i>Bmper</i>         |
| 1423833_a_at | -0.6 | <i>Brp44</i>         |
| 1433955_at   | 0.5  | <i>Brwd1</i>         |
| 1427270_a_at | -0.8 | <i>Bsdc1</i>         |
| 1424921_at   | 0.4  | <i>Bst2</i>          |
| 1425680_a_at | -0.9 | <i>Btrc</i>          |
| 1447363_s_at | 0.3  | <i>Bub1b</i>         |
| 1433611_s_at | 0.3  | <i>Bud31</i>         |
| 1450423_s_at | 0.7  | <i>Bxdc1</i>         |
| 1451144_at   | 0.4  | <i>Bxdc2</i>         |
| 1422767_at   | 0.5  | <i>Bysl</i>          |
| 1438221_at   | -0.5 | <i>C130065N10Rik</i> |
| 1422772_at   | -1   | <i>C1galt1</i>       |
| 1416655_at   | -0.3 | <i>C1galt1c1</i>     |
| 1437726_x_at | 0.3  | <i>C1qb</i>          |
| 1417063_at   | 0.5  | <i>C1qb</i>          |
| 1448274_at   | 0.4  | <i>C1qbp</i>         |
| 1439422_a_at | -0.7 | <i>C1qdc2</i>        |
| 1417393_a_at | -0.5 | <i>C1qdc2</i>        |
| 1416051_at   | -1   | <i>C2</i>            |
| 1441912_x_at | -0.8 | <i>C2</i>            |
| 1457664_x_at | -0.8 | <i>C2</i>            |
| 1426894_s_at | -0.8 | <i>C230093N12Rik</i> |
| 1454977_at   | -0.4 | <i>C2cd3</i>         |
| 1423954_at   | 1.5  | <i>C3</i>            |
| 1434171_at   | -0.5 | <i>C330011K17Rik</i> |
| 1436843_at   | -1   | <i>C430048L16Rik</i> |
| 1457588_at   | -0.8 | <i>C76213</i>        |
| 1440910_at   | -0.8 | <i>C77370</i>        |
| 1455830_s_at | -0.9 | <i>C87414</i>        |
| 1457677_at   | -1   | <i>C920016K16Rik</i> |
| 1452307_at   | -0.4 | <i>Cables2</i>       |
| 1417376_a_at | 0.7  | <i>Cadm1</i>         |
| 1448955_s_at | -0.9 | <i>Cadps</i>         |

|              |      |                 |
|--------------|------|-----------------|
| 1425814_a_at | -0.6 | <i>Calcr1</i>   |
| 1417365_a_at | 0.2  | <i>Calm1</i>    |
| 1450864_at   | -0.6 | <i>Calm3</i>    |
| 1415870_at   | 0.2  | <i>Calu</i>     |
| 1429622_at   | -0.8 | <i>Cand2</i>    |
| 1449434_at   | 3.1  | <i>Car3</i>     |
| 1460256_at   | 3.2  | <i>Car3</i>     |
| 1419743_s_at | 0.4  | <i>Carm1</i>    |
| 1448659_at   | 0.3  | <i>Casp7</i>    |
| 1426098_a_at | -0.8 | <i>Cast</i>     |
| 1451413_at   | -0.8 | <i>Cast</i>     |
| 1417327_at   | -0.7 | <i>Cav2</i>     |
| 1437203_at   | -0.8 | <i>Cbll1</i>    |
| 1427912_at   | 0.9  | <i>Cbr3</i>     |
| 1450416_at   | -1.2 | <i>Cbx5</i>     |
| 1418778_at   | 0.4  | <i>Ccdc109b</i> |
| 1460399_at   | -0.5 | <i>Ccdc117</i>  |
| 1434313_at   | -1.1 | <i>Ccdc126</i>  |
| 1455248_at   | 0.3  | <i>Ccdc127</i>  |
| 1451799_at   | -0.4 | <i>Ccdc25</i>   |
| 1457628_at   | -1.5 | <i>Ccdc53</i>   |
| 1439109_at   | -0.4 | <i>Ccdc68</i>   |
| 1417955_at   | -0.6 | <i>Ccdc71</i>   |
| 1418459_at   | -0.9 | <i>Ccdc91</i>   |
| 1434953_at   | -1.1 | <i>Ccdc93</i>   |
| 1420249_s_at | 0.7  | <i>Ccl6</i>     |
| 1417266_at   | 0.8  | <i>Ccl6</i>     |
| 1419684_at   | 0.8  | <i>Ccl8</i>     |
| 1417936_at   | 0.5  | <i>Ccl9</i>     |
| 1448205_at   | 0.5  | <i>Ccnb1</i>    |
| 1419943_s_at | 0.7  | <i>Ccnb1</i>    |
| 1448698_at   | 0.3  | <i>Ccnd1</i>    |
| 1417420_at   | 0.5  | <i>Ccnd1</i>    |
| 1416488_at   | -0.6 | <i>Ccng2</i>    |
| 1418585_at   | -0.7 | <i>Ccnh</i>     |
| 1448335_s_at | -0.4 | <i>Ceni</i>     |
| 1436789_at   | 0.9  | <i>Ccnj1</i>    |
| 1453740_a_at | -1.1 | <i>Ccnl2</i>    |
| 1454149_a_at | -0.8 | <i>Ccnl2</i>    |
| 1432195_s_at | -0.5 | <i>Ccnl2</i>    |
| 1432352_at   | -1   | <i>Ceny</i>     |
| 1419609_at   | 0.9  | <i>Ccr1</i>     |
| 1424727_at   | 1.1  | <i>Ccr5</i>     |
| 1459987_s_at | 0.3  | <i>Cct3</i>     |
| 1415867_at   | 0.2  | <i>Cct4</i>     |
| 1417258_at   | 0.3  | <i>Cct5</i>     |
| 1423517_at   | 0.2  | <i>Cct6a</i>    |

|              |      |                 |
|--------------|------|-----------------|
| 1455988_a_at | 0.2  | <i>Cct6a</i>    |
| 1415816_at   | 0.3  | <i>Cct7</i>     |
| 1415817_s_at | 0.3  | <i>Cct7</i>     |
| 1415785_a_at | 0.3  | <i>Cct8</i>     |
| 1448788_at   | 0.3  | <i>Cd200</i>    |
| 1416034_at   | 1.2  | <i>Cd24a</i>    |
| 1437502_x_at | 1.2  | <i>Cd24a</i>    |
| 1448182_a_at | 1.6  | <i>Cd24a</i>    |
| 1448919_at   | 0.2  | <i>Cd302</i>    |
| 1416072_at   | 0.5  | <i>Cd34</i>     |
| 1450883_a_at | 1    | <i>Cd36</i>     |
| 1423760_at   | 0.4  | <i>Cd44</i>     |
| 1434376_at   | 0.4  | <i>Cd44</i>     |
| 1419554_at   | 0.3  | <i>Cd47</i>     |
| 1449507_a_at | 0.3  | <i>Cd47</i>     |
| 1460218_at   | 1.1  | <i>Cd52</i>     |
| 1448617_at   | 0.5  | <i>Cd53</i>     |
| 1425519_a_at | 1.3  | <i>Cd74</i>     |
| 1416111_at   | -1.9 | <i>Cd83</i>     |
| 1428166_at   | -0.7 | <i>Cdan1</i>    |
| 1436913_at   | -0.6 | <i>Cdc14a</i>   |
| 1429418_at   | -0.5 | <i>Cdc14b</i>   |
| 1416664_at   | 0.7  | <i>Cdc20</i>    |
| 1439377_x_at | 0.7  | <i>Cdc20</i>    |
| 1448314_at   | 0.4  | <i>Cdc2a</i>    |
| 1440886_at   | -0.9 | <i>Cdc37l1</i>  |
| 1436197_at   | -0.6 | <i>Cdc42bpg</i> |
| 1427973_s_at | -0.7 | <i>Cdc73</i>    |
| 1437251_at   | 0.6  | <i>Cdca2</i>    |
| 1452040_a_at | 0.5  | <i>Cdca3</i>    |
| 1423682_a_at | 0.4  | <i>Cdca4</i>    |
| 1436847_s_at | 0.4  | <i>Cdca8</i>    |
| 1448261_at   | 1.2  | <i>Cdh1</i>     |
| 1433956_at   | -0.5 | <i>Cdh5</i>     |
| 1456314_x_at | 0.2  | <i>Cdk2ap1</i>  |
| 1426885_a_at | 0.4  | <i>Cdk2ap1</i>  |
| 1422441_x_at | 0.4  | <i>Cdk4</i>     |
| 1434045_at   | -0.5 | <i>Cdkn1b</i>   |
| 1449152_at   | -2.4 | <i>Cdkn2b</i>   |
| 1448842_at   | 2.6  | <i>Cdo1</i>     |
| 1434957_at   | 0.4  | <i>Cdon</i>     |
| 1417430_at   | 0.5  | <i>Cdr2</i>     |
| 1418982_at   | 0.9  | <i>Cebpa</i>    |
| 1423233_at   | 0.8  | <i>Cebpd</i>    |
| 1450842_a_at | 0.6  | <i>Cenpa</i>    |
| 1436723_at   | 0.4  | <i>Cenpi</i>    |
| 1429326_at   | 1.6  | <i>Cenpl</i>    |



|              |      |                |
|--------------|------|----------------|
| 1435433_at   | -1   | <i>Centg2</i>  |
| 1455072_at   | -0.5 | <i>Cep350</i>  |
| 1435370_a_at | 2.4  | <i>Ces3</i>    |
| 1417867_at   | 5.2  | <i>Cfd</i>     |
| 1416742_at   | 0.3  | <i>Cfdp1</i>   |
| 1455138_x_at | 0.2  | <i>Cfl1</i>    |
| 1448346_at   | 0.3  | <i>Cfl1</i>    |
| 1424996_at   | -0.5 | <i>Cflar</i>   |
| 1455658_at   | 0.5  | <i>Cggbp1</i>  |
| 1438659_x_at | 0.3  | <i>Chchd6</i>  |
| 1444318_at   | -1.2 | <i>Chchd7</i>  |
| 1431166_at   | 0.6  | <i>Chd1</i>    |
| 1457712_at   | -0.6 | <i>Chd8</i>    |
| 1450677_at   | -0.8 | <i>Chek1</i>   |
| 1439300_at   | -0.9 | <i>Chic1</i>   |
| 1429050_at   | 0.4  | <i>Chic2</i>   |
| 1453582_at   | -1.3 | <i>Chka</i>    |
| 1439824_at   | -0.5 | <i>Chm</i>     |
| 1418816_at   | -0.6 | <i>Chmp1b</i>  |
| 1435574_at   | -1.1 | <i>Chordc1</i> |
| 1460645_at   | -0.3 | <i>Chordc1</i> |
| 1435446_a_at | 0.4  | <i>Chpt1</i>   |
| 1426146_a_at | 0.7  | <i>Chpt1</i>   |
| 1459859_x_at | 0.4  | <i>Chrac1</i>  |
| 1428902_at   | 0.4  | <i>Chst11</i>  |
| 1451383_a_at | -0.6 | <i>Chuk</i>    |
| 1416332_at   | 0.9  | <i>Cirbp</i>   |
| 1448724_at   | -1.8 | <i>Cish</i>    |
| 1426754_x_at | 0.2  | <i>Ckap4</i>   |
| 1452181_at   | 0.4  | <i>Ckap4</i>   |
| 1455019_x_at | 0.4  | <i>Ckap4</i>   |
| 1451832_at   | -0.6 | <i>Cklf</i>    |
| 1424495_a_at | -0.5 | <i>Cklf</i>    |
| 1448441_at   | 0.3  | <i>Cks1b</i>   |
| 1416698_a_at | 0.4  | <i>Cks1b</i>   |
| 1424836_a_at | -0.4 | <i>Clasp2</i>  |
| 1437270_a_at | 0.4  | <i>Clef1</i>   |
| 1420296_at   | -1.6 | <i>Clen5</i>   |
| 1429400_at   | -0.8 | <i>Clen5</i>   |
| 1449428_at   | -2.2 | <i>Cldn18</i>  |
| 1417839_at   | -0.7 | <i>Cldn5</i>   |
| 1456318_at   | -0.9 | <i>Clec1a</i>  |
| 1429954_at   | 0.8  | <i>Clec4a3</i> |
| 1438606_a_at | 0.2  | <i>Clic4</i>   |
| 1426124_a_at | -0.6 | <i>Clk1</i>    |
| 1422886_a_at | -0.5 | <i>Clk4</i>    |
| 1436935_x_at | 0.2  | <i>Clms1a</i>  |

|              |      |                 |
|--------------|------|-----------------|
| 1423181_s_at | 0.3  | <i>Clns1a</i>   |
| 1439314_at   | -0.8 | <i>Clock</i>    |
| 1421062_s_at | 0.2  | <i>Clta</i>     |
| 1451322_at   | -2   | <i>Cmb1</i>     |
| 1436836_x_at | 0.1  | <i>Cnn3</i>     |
| 1426724_at   | 0.4  | <i>Cnn3</i>     |
| 1453191_at   | -0.7 | <i>Col27a1</i>  |
| 1426348_at   | 0.2  | <i>Col4a1</i>   |
| 1452035_at   | 0.2  | <i>Col4a1</i>   |
| 1424051_at   | 0.3  | <i>Col4a2</i>   |
| 1420384_at   | -1.1 | <i>Col4a3bp</i> |
| 1452867_at   | -0.5 | <i>Col4a3bp</i> |
| 1425476_at   | -0.9 | <i>Col4a5</i>   |
| 1416740_at   | 0.3  | <i>Col5a1</i>   |
| 1434479_at   | 0.5  | <i>Col5a1</i>   |
| 1426947_x_at | 0.2  | <i>Col6a2</i>   |
| 1424131_at   | 0.2  | <i>Col6a3</i>   |
| 1458345_s_at | -2.3 | <i>Colec11</i>  |
| 1437274_at   | -0.9 | <i>Copa</i>     |
| 1416678_at   | 0.2  | <i>Cops3</i>    |
| 1416163_at   | 0.3  | <i>Cops4</i>    |
| 1416246_a_at | 0.9  | <i>Coro1a</i>   |
| 1455269_a_at | 1.3  | <i>Coro1a</i>   |
| 1452367_at   | -1.1 | <i>Coro2a</i>   |
| 1436838_x_at | 0.6  | <i>Cot11</i>    |
| 1434435_s_at | -0.4 | <i>Cox17</i>    |
| 1418709_at   | -1.8 | <i>Cox7a1</i>   |
| 1417496_at   | -0.8 | <i>Cp</i>       |
| 1418018_at   | -0.7 | <i>Cpd</i>      |
| 1415949_at   | -0.4 | <i>Cpe</i>      |
| 1437765_at   | -1.2 | <i>Cpeb3</i>    |
| 1420617_at   | -0.5 | <i>Cpeb4</i>    |
| 1420618_at   | -0.5 | <i>Cpeb4</i>    |
| 1437372_at   | -1.5 | <i>Cpsf6</i>    |
| 1416772_at   | -0.4 | <i>Cpt2</i>     |
| 1448901_at   | 0.6  | <i>Cpxm1</i>    |
| 1460248_at   | -0.8 | <i>Cpxm2</i>    |
| 1419979_s_at | 0.5  | <i>Creb3</i>    |
| 1424740_at   | 0.5  | <i>Creb3</i>    |
| 1424741_s_at | 0.5  | <i>Creb3</i>    |
| 1436983_at   | -0.7 | <i>Crebbp</i>   |
| 1435085_at   | -0.7 | <i>Crebl2</i>   |
| 1452857_at   | -0.6 | <i>Crebzf</i>   |
| 1452754_at   | 0.3  | <i>Creld2</i>   |
| 1416326_at   | 0.4  | <i>Crip1</i>    |
| 1434758_at   | 0.6  | <i>Crispld2</i> |
| 1460458_at   | 0.6  | <i>Crispld2</i> |

|              |      |                   |
|--------------|------|-------------------|
| 1437056_x_at | 0.7  | <i>Crispld2</i>   |
| 1460176_at   | -0.5 | <i>Crk</i>        |
| 1430546_at   | -1.6 | <i>Cryz11</i>     |
| 1427981_a_at | -0.6 | <i>Csad</i>       |
| 1451012_a_at | 0.3  | <i>Csda</i>       |
| 1455660_at   | 0.6  | <i>Csf2rb</i>     |
| 1452366_at   | -1.2 | <i>Csgalnact1</i> |
| 1417176_at   | 0.3  | <i>Csnk1e</i>     |
| 1424627_at   | -2.1 | <i>Cst12</i>      |
| 1424479_at   | -2.2 | <i>Cst8</i>       |
| 1426445_at   | -0.5 | <i>Ctage5</i>     |
| 1415702_a_at | 0.2  | <i>Ctbp1</i>      |
| 1452697_at   | 0.5  | <i>Ctdp1</i>      |
| 1416953_at   | 0.5  | <i>Ctgf</i>       |
| 1452352_at   | 0.4  | <i>Ctla2b</i>     |
| 1448582_at   | 0.5  | <i>Ctmb11</i>     |
| 1416563_at   | 0.5  | <i>Ctps</i>       |
| 1416382_at   | 0.3  | <i>Ctsc</i>       |
| 1451019_at   | -1.2 | <i>Ctsf</i>       |
| 1451310_a_at | 0.3  | <i>Ctsl</i>       |
| 1457724_at   | 0.9  | <i>Ctsl</i>       |
| 1448591_at   | 0.6  | <i>Ctss</i>       |
| 1421315_s_at | -0.4 | <i>Cttm</i>       |
| 1450069_a_at | 0.3  | <i>Cugbp2</i>     |
| 1417574_at   | 0.2  | <i>Cxcl12</i>     |
| 1418456_a_at | 0.7  | <i>Cxcl14</i>     |
| 1418457_at   | 1    | <i>Cxcl14</i>     |
| 1448710_at   | 0.7  | <i>Cxcr4</i>      |
| 1431469_a_at | -0.5 | <i>Cxxc5</i>      |
| 1448960_at   | -0.4 | <i>Cxxc5</i>      |
| 1416727_a_at | -0.6 | <i>Cyb5</i>       |
| 1426307_at   | -0.5 | <i>Cyb5r4</i>     |
| 1434245_a_at | -0.8 | <i>Cybasc3</i>    |
| 1422483_a_at | 0.2  | <i>Cycs</i>       |
| 1449273_at   | -1.6 | <i>Cyfp2</i>      |
| 1428347_at   | -1.4 | <i>Cyfp2</i>      |
| 1456362_at   | 1.1  | <i>Cyp11b1</i>    |
| 1450574_at   | 0.8  | <i>Cyp11b2</i>    |
| 1416613_at   | -1   | <i>Cyp1b1</i>     |
| 1415994_at   | 4.9  | <i>Cyp2e1</i>     |
| 1428283_at   | 0.7  | <i>Cyp2s1</i>     |
| 1419219_at   | 0.7  | <i>Cyp4f18</i>    |
| 1450646_at   | 0.2  | <i>Cyp51</i>      |
| 1422533_at   | 0.3  | <i>Cyp51</i>      |
| 1416039_x_at | 1    | <i>Cyr61</i>      |
| 1438133_a_at | 1.3  | <i>Cyr61</i>      |
| 1435701_at   | -2.7 | <i>Cyyr1</i>      |

|              |      |                      |
|--------------|------|----------------------|
| 1455384_x_at | -0.8 | <i>D030056L22Rik</i> |
| 1428969_at   | -0.5 | <i>D030074E01Rik</i> |
| 1436736_x_at | -1.2 | <i>D0H4S114</i>      |
| 1450839_at   | -1   | <i>D0H4S114</i>      |
| 1420129_s_at | 0.3  | <i>D10Wsu52e</i>     |
| 1428408_a_at | -0.6 | <i>D12ErtD551e</i>   |
| 1443068_at   | -1.2 | <i>D130084N16Rik</i> |
| 1460689_at   | 0.5  | <i>D15Wsu75e</i>     |
| 1434173_s_at | 0.4  | <i>D19Bwg1357e</i>   |
| 1426931_s_at | 0.6  | <i>D19Bwg1357e</i>   |
| 1440417_at   | -1.1 | <i>D19ErtD409e</i>   |
| 1452918_at   | 0.2  | <i>D19ErtD737e</i>   |
| 1436293_x_at | 0.4  | <i>D1ErtD471e</i>    |
| 1437840_s_at | -0.6 | <i>D2hgdh</i>        |
| 1455757_at   | -0.6 | <i>D3ErtD254e</i>    |
| 1443490_at   | -0.9 | <i>D3ErtD34e</i>     |
| 1448538_a_at | -1.4 | <i>D4Wsu53e</i>      |
| 1435357_at   | -1   | <i>D4Wsu53e</i>      |
| 1417001_a_at | -0.7 | <i>D4Wsu53e</i>      |
| 1440642_at   | -2.4 | <i>D630042P16Rik</i> |
| 1423872_a_at | -0.4 | <i>Dag1</i>          |
| 1450848_at   | 0.2  | <i>Dap3</i>          |
| 1418334_at   | 0.5  | <i>Dbf4</i>          |
| 1422432_at   | 0.2  | <i>Dbi</i>           |
| 1436659_at   | 0.4  | <i>Dcl1</i>          |
| 1449368_at   | 0.2  | <i>Dcn</i>           |
| 1452079_s_at | -0.3 | <i>Dcum1d1</i>       |
| 1435059_at   | -0.4 | <i>Ddef1</i>         |
| 1444139_at   | -0.5 | <i>Ddit4l</i>        |
| 1422738_at   | -2.4 | <i>Ddr2</i>          |
| 1415915_at   | 0.5  | <i>Ddx1</i>          |
| 1448270_at   | 0.3  | <i>Ddx21</i>         |
| 1448271_a_at | 0.8  | <i>Ddx21</i>         |
| 1438168_x_at | 0.4  | <i>Ddx39</i>         |
| 1455814_x_at | 0.4  | <i>Ddx39</i>         |
| 1451065_a_at | 0.5  | <i>Ddx39</i>         |
| 1423643_at   | 0.6  | <i>Ddx39</i>         |
| 1438287_x_at | 0.7  | <i>Ddx39</i>         |
| 1423043_s_at | 0.1  | <i>Ddx3x</i>         |
| 1455563_at   | 0.5  | <i>Ddx49</i>         |
| 1424598_at   | -0.6 | <i>Ddx6</i>          |
| 1456076_at   | 0.7  | <i>Defb19</i>        |
| 1434846_at   | -0.5 | <i>Dennd4c</i>       |
| 1420368_at   | 0.6  | <i>Denr</i>          |
| 1451348_at   | -0.7 | <i>Depdc6</i>        |
| 1453571_at   | -0.6 | <i>Depdc6</i>        |
| 1428622_at   | -0.4 | <i>Depdc6</i>        |

|              |      |                 |
|--------------|------|-----------------|
| 1415693_at   | 0.2  | <i>Derl1</i>    |
| 1426731_at   | 0.9  | <i>Des</i>      |
| 1421534_at   | 0.5  | <i>Dfna5</i>    |
| 1439263_at   | 0.8  | <i>Dfna5</i>    |
| 1418295_s_at | 0.5  | <i>Dgat1</i>    |
| 1422678_at   | 0.6  | <i>Dgat2</i>    |
| 1418129_at   | -0.3 | <i>Dhcr24</i>   |
| 1424398_at   | -0.4 | <i>Dhx36</i>    |
| 1417683_at   | -0.7 | <i>Diablo</i>   |
| 1444744_at   | -1   | <i>Dido1</i>    |
| 1418937_at   | 0.8  | <i>Dio2</i>     |
| 1452908_at   | -0.5 | <i>Dip2a</i>    |
| 1427410_at   | -0.8 | <i>Dleu2</i>    |
| 1418287_a_at | 0.3  | <i>Dmbt1</i>    |
| 1428781_at   | 1.4  | <i>Dmkn</i>     |
| 1457275_at   | -1   | <i>Dmn</i>      |
| 1424672_at   | -0.8 | <i>Dmxl1</i>    |
| 1459835_s_at | -0.7 | <i>Dnaja1</i>   |
| 1416288_at   | -0.5 | <i>Dnaja1</i>   |
| 1460179_at   | -0.4 | <i>Dnaja1</i>   |
| 1429476_s_at | 0.2  | <i>Dnaja2</i>   |
| 1418591_at   | -1.2 | <i>Dnaja4</i>   |
| 1434196_at   | -0.9 | <i>Dnaja4</i>   |
| 1418592_at   | -0.8 | <i>Dnaja4</i>   |
| 1416755_at   | -0.8 | <i>Dnajib1</i>  |
| 1416756_at   | -0.6 | <i>Dnajib1</i>  |
| 1423151_at   | 0.2  | <i>Dnajib11</i> |
| 1430561_at   | -1   | <i>Dnajib14</i> |
| 1451177_at   | -0.4 | <i>Dnajib4</i>  |
| 1417191_at   | -0.5 | <i>Dnajib9</i>  |
| 1426905_a_at | 0.3  | <i>Dnajc10</i>  |
| 1417441_at   | -0.6 | <i>Dnajc12</i>  |
| 1437546_at   | -0.5 | <i>Dnajc14</i>  |
| 1434863_at   | -0.5 | <i>Dnajc18</i>  |
| 1417657_s_at | 0.6  | <i>Dnajc2</i>   |
| 1460711_at   | 0.5  | <i>Dnajc21</i>  |
| 1452683_at   | 0.2  | <i>Dnajc8</i>   |
| 1452382_at   | -0.7 | <i>Dnm3os</i>   |
| 1420667_at   | -0.6 | <i>Doc2b</i>    |
| 1450932_s_at | -0.5 | <i>Dock9</i>    |
| 1435680_a_at | -0.5 | <i>Dpp7</i>     |
| 1418511_at   | 0.6  | <i>Dpt</i>      |
| 1438789_s_at | 0.3  | <i>Dpysl3</i>   |
| 1418298_s_at | -0.8 | <i>Dpysl4</i>   |
| 1447752_x_at | 0.6  | <i>Drg1</i>     |
| 1448336_at   | 0.7  | <i>Drg1</i>     |
| 1434688_x_at | 0.8  | <i>Drg1</i>     |

|              |      |                      |
|--------------|------|----------------------|
| 1426911_at   | -1.1 | <i>Dsc2</i>          |
| 1439476_at   | -0.9 | <i>Dsg2</i>          |
| 1435208_at   | 0.6  | <i>Dtx3l</i>         |
| 1435734_x_at | 0.4  | <i>Dusp11</i>        |
| 1448830_at   | -1.3 | <i>Dusp1</i>         |
| 1418401_a_at | -1.1 | <i>Dusp16</i>        |
| 1434472_at   | -0.5 | <i>Dusp3</i>         |
| 1418371_at   | 0.4  | <i>Dynl12</i>        |
| 1449928_at   | -1   | <i>Dynlt3</i>        |
| 1420614_at   | -0.6 | <i>Dynlt3</i>        |
| 1459854_s_at | -0.5 | <i>Dynlt3</i>        |
| 1449929_at   | -0.4 | <i>Dynlt3</i>        |
| 1438277_at   | -0.8 | <i>E130308A19Rik</i> |
| 1444124_a_at | -0.9 | <i>E330017L17Rik</i> |
| 1441970_at   | -0.3 | <i>E430010N07Rik</i> |
| 1416667_at   | -0.4 | <i>Ebp</i>           |
| 1417298_at   | -0.7 | <i>Ebpl</i>          |
| 1434177_at   | -0.8 | <i>Ece1</i>          |
| 1419552_at   | -0.6 | <i>Echdc1</i>        |
| 1418862_at   | -0.4 | <i>Echdc3</i>        |
| 1448613_at   | -1   | <i>Ecm1</i>          |
| 1459133_at   | -1.3 | <i>Edem3</i>         |
| 1460401_at   | -0.7 | <i>Edem3</i>         |
| 1449161_at   | 1.2  | <i>Edn2</i>          |
| 1437347_at   | -1.7 | <i>Ednrb</i>         |
| 1449506_a_at | 0.3  | <i>Eef1d</i>         |
| 1417364_at   | 0.2  | <i>Eef1g</i>         |
| 1427183_at   | -0.8 | <i>Efemp1</i>        |
| 1418285_at   | -0.5 | <i>Efnb1</i>         |
| 1438835_a_at | 0.2  | <i>Eftud2</i>        |
| 1439831_at   | 1.9  | <i>EG240327</i>      |
| 1460017_at   | -0.6 | <i>EG434179</i>      |
| 1438050_x_at | -0.9 | <i>EG668525</i>      |
| 1417065_at   | 0.3  | <i>Egr1</i>          |
| 1427682_a_at | 0.8  | <i>Egr2</i>          |
| 1427683_at   | 0.8  | <i>Egr2</i>          |
| 1416010_a_at | 0.3  | <i>Ehd1</i>          |
| 1448406_at   | -0.6 | <i>Eid1</i>          |
| 1416614_at   | -0.5 | <i>Eid1</i>          |
| 1424344_s_at | 0.5  | <i>Eif1a</i>         |
| 1428542_at   | 0.4  | <i>Eif1ad</i>        |
| 1434538_x_at | 0.3  | <i>Eif2b2</i>        |
| 1426366_at   | -0.7 | <i>Eif2c2</i>        |
| 1429779_at   | -1.6 | <i>Eif2c4</i>        |
| 1453289_at   | -0.8 | <i>Eif2c4</i>        |
| 1452662_a_at | 0.3  | <i>Eif2s1</i>        |
| 1417712_at   | 0.2  | <i>Eif2s2</i>        |

|              |      |                 |
|--------------|------|-----------------|
| 1456617_a_at | 0.2  | <i>Eif2s2</i>   |
| 1423744_x_at | 0.2  | <i>Eif2s3x</i>  |
| 1426674_at   | 0.4  | <i>Eif3b</i>    |
| 1456374_x_at | 0.2  | <i>Eif3c</i>    |
| 1416100_at   | 0.4  | <i>Eif3d</i>    |
| 1417718_at   | 0.3  | <i>Eif3g</i>    |
| 1427058_at   | 0.2  | <i>Eif4a1</i>   |
| 1430980_a_at | 0.3  | <i>Eif4a1</i>   |
| 1450934_at   | -0.7 | <i>Eif4a2</i>   |
| 1417242_at   | 0.3  | <i>Eif4a3</i>   |
| 1435803_a_at | 0.2  | <i>Eif4e2</i>   |
| 1434976_x_at | 0.4  | <i>Eif4ebp1</i> |
| 1417084_at   | -1.3 | <i>Eif4ebp2</i> |
| 1438554_x_at | 0.2  | <i>Eif4h</i>    |
| 1451521_x_at | 0.3  | <i>Eif4h</i>    |
| 1451470_s_at | 0.2  | <i>Eif5a</i>    |
| 1427578_a_at | 0.4  | <i>Eif6</i>     |
| 1428477_at   | 0.7  | <i>Elac2</i>    |
| 1435143_at   | -0.8 | <i>Elk3</i>     |
| 1450744_at   | -0.9 | <i>Ell2</i>     |
| 1456530_x_at | 0.3  | <i>Elov1</i>    |
| 1455994_x_at | 0.4  | <i>Elov1</i>    |
| 1437211_x_at | -0.4 | <i>Elov15</i>   |
| 1417403_at   | 0.3  | <i>Elov16</i>   |
| 1417404_at   | 0.3  | <i>Elov16</i>   |
| 1415857_at   | -0.4 | <i>Emb</i>      |
| 1416393_at   | 0.5  | <i>Emg1</i>     |
| 1416414_at   | 0.4  | <i>Emilin1</i>  |
| 1435264_at   | 0.8  | <i>Emilin2</i>  |
| 1421624_a_at | -1   | <i>Enah</i>     |
| 1424800_at   | -0.5 | <i>Enah</i>     |
| 1426541_a_at | -1.4 | <i>Endod1</i>   |
| 1426543_x_at | -1   | <i>Endod1</i>   |
| 1426540_at   | -0.8 | <i>Endod1</i>   |
| 1433796_at   | -0.5 | <i>Endod1</i>   |
| 1419023_x_at | 0.3  | <i>Eno1</i>     |
| 1419022_a_at | 0.4  | <i>Eno1</i>     |
| 1427404_x_at | 0.4  | <i>Eno1</i>     |
| 1448649_at   | 0.5  | <i>Enpep</i>    |
| 1440339_at   | -0.7 | <i>Enpp1</i>    |
| 1448136_at   | 0.7  | <i>Enpp2</i>    |
| 1425199_a_at | -0.8 | <i>Epb4.115</i> |
| 1455317_at   | -0.4 | <i>Epc2</i>     |
| 1421815_at   | -1.2 | <i>Epdr1</i>    |
| 1450380_at   | -0.8 | <i>Epdr1</i>    |
| 1460074_x_at | -0.6 | <i>Epdr1</i>    |
| 1425575_at   | -1.3 | <i>Epha3</i>    |

|              |      |                 |
|--------------|------|-----------------|
| 1434106_at   | -0.7 | <i>Epm2aip1</i> |
| 1426713_s_at | 0.1  | <i>Eprs</i>     |
| 1439068_at   | 0.8  | <i>Erap1</i>    |
| 1416942_at   | 1.4  | <i>Erap1</i>    |
| 1419431_at   | 1.8  | <i>Ereg</i>     |
| 1430536_a_at | 0.3  | <i>Erh</i>      |
| 1419816_s_at | 0.6  | <i>Errfi1</i>   |
| 1416129_at   | 0.7  | <i>Errfi1</i>   |
| 1435663_at   | -1   | <i>Esr1</i>     |
| 1460591_at   | -0.5 | <i>Esr1</i>     |
| 1451208_at   | 0.3  | <i>Etf1</i>     |
| 1420024_s_at | 0.4  | <i>Etf1</i>     |
| 1451084_at   | -0.5 | <i>Etf1dh</i>   |
| 1426725_s_at | -0.9 | <i>Ets1</i>     |
| 1452163_at   | -0.7 | <i>Ets1</i>     |
| 1436884_x_at | 0.2  | <i>Ewsr1</i>    |
| 1428291_at   | 0.4  | <i>Exosc8</i>   |
| 1450850_at   | 0.5  | <i>Ezr</i>      |
| 1449305_at   | -1   | <i>F10</i>      |
| 1448929_at   | 0.4  | <i>F13a1</i>    |
| 1417408_at   | 0.6  | <i>F3</i>       |
| 1451263_a_at | 2.2  | <i>Fabp4</i>    |
| 1417023_a_at | 2.6  | <i>Fabp4</i>    |
| 1416022_at   | -0.7 | <i>Fabp5</i>    |
| 1416021_a_at | -0.5 | <i>Fabp5</i>    |
| 1440444_at   | -0.7 | <i>Fads1</i>    |
| 1443904_at   | -0.8 | <i>Fads6</i>    |
| 1423709_s_at | 0.3  | <i>Farsb</i>    |
| 1423828_at   | 0.9  | <i>Fasn</i>     |
| 1459749_s_at | -1.2 | <i>Fat4</i>     |
| 1416684_at   | 0.3  | <i>Fbl</i>      |
| 1416685_s_at | 0.6  | <i>Fbl</i>      |
| 1449141_at   | 0.3  | <i>Fblim1</i>   |
| 1440286_at   | -1.9 | <i>Fbxl16</i>   |
| 1433441_at   | -0.4 | <i>Fbxl5</i>    |
| 1434108_at   | -0.4 | <i>Fbxo11</i>   |
| 1423490_at   | -0.5 | <i>Fbxo3</i>    |
| 1435477_s_at | 0.3  | <i>Fcgr2b</i>   |
| 1448620_at   | 0.5  | <i>Fcgr3</i>    |
| 1437200_at   | -0.6 | <i>Fcho2</i>    |
| 1418698_a_at | -0.6 | <i>Fech</i>     |
| 1453794_at   | -1.8 | <i>Fer114</i>   |
| 1456014_s_at | 0.8  | <i>Fermt3</i>   |
| 1449555_a_at | 1.8  | <i>Fetub</i>    |
| 1423136_at   | 0.9  | <i>Fgfl</i>     |
| 1438405_at   | 1.9  | <i>Fgf7</i>     |
| 1421854_at   | 0.5  | <i>Fgl2</i>     |



|              |      |                  |
|--------------|------|------------------|
| 1421855_at   | 0.5  | <i>Fgl2</i>      |
| 1417872_at   | 0.3  | <i>Fhl1</i>      |
| 1435551_at   | -2   | <i>Fhod3</i>     |
| 1438954_x_at | 0.5  | <i>Figf</i>      |
| 1449528_at   | 0.7  | <i>Figf</i>      |
| 1448184_at   | 0.3  | <i>Fkbp1a</i>    |
| 1416036_at   | 0.4  | <i>Fkbp1a</i>    |
| 1416362_a_at | 0.4  | <i>Fkbp4</i>     |
| 1448231_at   | -0.5 | <i>Fkbp5</i>     |
| 1426677_at   | 0.2  | <i>Flna</i>      |
| 1426825_at   | -0.7 | <i>Fmnl3</i>     |
| 1431226_a_at | 0.7  | <i>Fndc4</i>     |
| 1450995_at   | -1.5 | <i>Folr1</i>     |
| 1423100_at   | 1.1  | <i>Fos</i>       |
| 1442933_at   | -0.8 | <i>Foxk2</i>     |
| 1456410_at   | -0.6 | <i>Foxl2</i>     |
| 1456552_at   | -0.6 | <i>Foxl2os</i>   |
| 1438232_at   | -0.5 | <i>Foxp2</i>     |
| 1429519_at   | -0.7 | <i>Fpgt</i>      |
| 1436413_at   | -0.9 | <i>Frk</i>       |
| 1435956_at   | 0.5  | <i>Frmf5</i>     |
| 1456480_at   | -1.1 | <i>Fry</i>       |
| 1416658_at   | 1.1  | <i>Frzb</i>      |
| 1448424_at   | 1.3  | <i>Frzb</i>      |
| 1421365_at   | -0.9 | <i>Fst</i>       |
| 1418364_a_at | -0.4 | <i>Ftl1</i>      |
| 1451026_at   | 0.5  | <i>Ftsj3</i>     |
| 1437986_x_at | -1.9 | <i>Fuk</i>       |
| 1460319_at   | -0.3 | <i>Fut8</i>      |
| 1418296_at   | 0.4  | <i>Fxyd5</i>     |
| 1419301_at   | -1   | <i>Fzd4</i>      |
| 1423758_at   | 0.2  | <i>G3bp2</i>     |
| 1423187_at   | -0.5 | <i>Gabarapl2</i> |
| 1449519_at   | -1   | <i>Gadd45a</i>   |
| 1452907_at   | -0.4 | <i>Galc</i>      |
| 1417177_at   | 0.4  | <i>Galk1</i>     |
| 1425610_s_at | -0.8 | <i>Galnt2</i>    |
| 1425581_s_at | -0.8 | <i>Galnt7</i>    |
| 1452232_at   | -0.5 | <i>Galnt7</i>    |
| 1454780_at   | -0.9 | <i>Galnt14</i>   |
| 1423784_at   | 0.2  | <i>Gars</i>      |
| 1416283_at   | 0.5  | <i>Gart</i>      |
| 1450112_a_at | -1.9 | <i>Gas2</i>      |
| 1455980_a_at | -1.2 | <i>Gas2l3</i>    |
| 1425599_a_at | -0.5 | <i>Gatad1</i>    |
| 1451589_at   | -0.6 | <i>Gats</i>      |
| 1418240_at   | 1.7  | <i>Gbp2</i>      |

|              |      |               |
|--------------|------|---------------|
| 1435906_x_at | 1.7  | <i>Gbp2</i>   |
| 1418392_a_at | 1.5  | <i>Gbp3</i>   |
| 1434380_at   | 2    | <i>Gbp6</i>   |
| 1429692_s_at | -0.7 | <i>Gch1</i>   |
| 1426783_at   | 0.4  | <i>Gcn5l2</i> |
| 1425503_at   | 0.9  | <i>Gcnt2</i>  |
| 1435749_at   | 0.5  | <i>Gda</i>    |
| 1435748_at   | 0.8  | <i>Gda</i>    |
| 1420342_at   | -0.5 | <i>Gdap10</i> |
| 1451070_at   | -0.5 | <i>Gdi1</i>   |
| 1424077_at   | -0.4 | <i>Gdpd1</i>  |
| 1419595_a_at | 0.4  | <i>Ggh</i>    |
| 1415881_at   | -0.5 | <i>Ghitm</i>  |
| 1417962_s_at | 0.3  | <i>Ghr</i>    |
| 1452598_at   | 0.9  | <i>Gims1</i>  |
| 1415801_at   | -1.4 | <i>Gja1</i>   |
| 1438650_x_at | -0.7 | <i>Gja1</i>   |
| 1438945_x_at | -0.7 | <i>Gja1</i>   |
| 1415800_at   | -0.5 | <i>Gja1</i>   |
| 1437992_x_at | -0.5 | <i>Gja1</i>   |
| 1436070_at   | -0.3 | <i>Glo1</i>   |
| 1434657_at   | -0.6 | <i>Gls</i>    |
| 1416209_at   | 0.2  | <i>Glud1</i>  |
| 1448253_at   | 0.2  | <i>Glud1</i>  |
| 1426236_a_at | 0.3  | <i>Glul</i>   |
| 1426235_a_at | 0.7  | <i>Glul</i>   |
| 1416188_at   | -1   | <i>Gm2a</i>   |
| 1448241_at   | -0.4 | <i>Gm2a</i>   |
| 1435473_at   | -0.6 | <i>Gm347</i>  |
| 1445687_at   | 1.3  | <i>Gm885</i>  |
| 1436827_at   | -0.9 | <i>Gm944</i>  |
| 1417114_at   | -0.7 | <i>Gmcl1</i>  |
| 1438887_a_at | -0.6 | <i>Gmcl1</i>  |
| 1433567_at   | 0.2  | <i>Gmps</i>   |
| 1428939_s_at | -0.9 | <i>Gnaq</i>   |
| 1455168_a_at | 0.1  | <i>Gnb2l1</i> |
| 1426579_at   | 0.6  | <i>Gnl2</i>   |
| 1433656_a_at | 0.3  | <i>Gnl3</i>   |
| 1426524_at   | -0.9 | <i>Gnpda2</i> |
| 1426523_a_at | -0.6 | <i>Gnpda2</i> |
| 1436526_at   | -1   | <i>Gnptg</i>  |
| 1435032_at   | -0.9 | <i>Golgb1</i> |
| 1450970_at   | 0.4  | <i>Got1</i>   |
| 1421088_at   | 0.2  | <i>Gpc4</i>   |
| 1428323_at   | -0.6 | <i>Gpd2</i>   |
| 1417434_at   | -0.4 | <i>Gpd2</i>   |
| 1440225_at   | -0.6 | <i>Gpr116</i> |

|              |      |                |
|--------------|------|----------------|
| 1450881_s_at | -0.6 | <i>Gpr137b</i> |
| 1423825_at   | -0.9 | <i>Gpr177</i>  |
| 1424613_at   | 0.5  | <i>Gprc5b</i>  |
| 1451411_at   | 1.1  | <i>Gprc5b</i>  |
| 1415699_a_at | 0.3  | <i>Gps1</i>    |
| 1438385_s_at | 0.5  | <i>Gpt2</i>    |
| 1460671_at   | -0.3 | <i>Gpx1</i>    |
| 1416708_a_at | -0.7 | <i>Gramd1a</i> |
| 1435402_at   | 0.6  | <i>Gramd1b</i> |
| 1417673_at   | -0.7 | <i>Grb14</i>   |
| 1437001_at   | -0.8 | <i>Gsk3b</i>   |
| 1415812_at   | 0.6  | <i>Gsn</i>     |
| 1437171_x_at | 0.6  | <i>Gsn</i>     |
| 1436991_x_at | 0.7  | <i>Gsn</i>     |
| 1456312_x_at | 0.8  | <i>Gsn</i>     |
| 1421817_at   | 0.3  | <i>Gsr</i>     |
| 1421040_a_at | 0.9  | <i>Gsta2</i>   |
| 1416368_at   | 0.9  | <i>Gsta4</i>   |
| 1416416_x_at | 0.3  | <i>Gstm1</i>   |
| 1448330_at   | 0.3  | <i>Gstm1</i>   |
| 1416411_at   | 0.7  | <i>Gstm2</i>   |
| 1419072_at   | -0.8 | <i>Gstm7</i>   |
| 1449575_a_at | 0.3  | <i>Gstp1</i>   |
| 1427552_a_at | 0.9  | <i>Gstz1</i>   |
| 1434290_at   | 0.6  | <i>Gtde1</i>   |
| 1426626_at   | 0.9  | <i>Gtf2f2</i>  |
| 1450873_at   | 0.4  | <i>Gtpbp4</i>  |
| 1441836_x_at | -1   | <i>Gtsf1</i>   |
| 1434141_at   | -0.6 | <i>Gucy1a3</i> |
| 1420872_at   | -0.8 | <i>Gucy1b3</i> |
| 1434423_at   | -0.6 | <i>Gulp1</i>   |
| 1429184_at   | 1.5  | <i>Gvin1</i>   |
| 1438858_x_at | 1.2  | <i>H2-Aa</i>   |
| 1435290_x_at | 1.4  | <i>H2-Aa</i>   |
| 1452431_s_at | 1.4  | <i>H2-Aa</i>   |
| 1425477_x_at | 1.4  | <i>H2-Ab1</i>  |
| 1451721_a_at | 1.4  | <i>H2-Ab1</i>  |
| 1450648_s_at | 1.5  | <i>H2-Ab1</i>  |
| 1436596_at   | -0.5 | <i>H2afv</i>   |
| 1416415_a_at | 0.3  | <i>H2afz</i>   |
| 1438091_a_at | 0.3  | <i>H2afz</i>   |
| 1426324_at   | 0.9  | <i>H2-D1</i>   |
| 1425614_x_at | 1    | <i>H2-D1</i>   |
| 1425545_x_at | 1.1  | <i>H2-D1</i>   |
| 1451683_x_at | 1.1  | <i>H2-D1</i>   |
| 1451784_x_at | 1.1  | <i>H2-D1</i>   |
| 1427651_x_at | 1.2  | <i>H2-D1</i>   |

|              |      |                  |
|--------------|------|------------------|
| 1452544_x_at | 1.2  | <i>H2-D1</i>     |
| 1422527_at   | 1.3  | <i>H2-DMa</i>    |
| 1422891_at   | 1.3  | <i>H2-Ea</i>     |
| 1422892_s_at | 1.4  | <i>H2-Ea</i>     |
| 1417025_at   | 1.3  | <i>H2-Eb1</i>    |
| 1450534_x_at | 0.9  | <i>H2-K1</i>     |
| 1424948_x_at | 1    | <i>H2-K1</i>     |
| 1425336_x_at | 1    | <i>H2-K1</i>     |
| 1427746_x_at | 1.2  | <i>H2-K1</i>     |
| 1454987_a_at | -0.6 | <i>H2-Ke6</i>    |
| 1451931_x_at | 1.1  | <i>H2-L</i>      |
| 1421358_at   | 0.7  | <i>H2-M3</i>     |
| 1418536_at   | 1.5  | <i>H2-Q8</i>     |
| 1449875_s_at | 0.6  | <i>H2-T10</i>    |
| 1449556_at   | 0.6  | <i>H2-T23</i>    |
| 1448704_s_at | 0.2  | <i>H47</i>       |
| 1452145_at   | 0.9  | <i>H6pd</i>      |
| 1460184_at   | -0.4 | <i>Hadh</i>      |
| 1424172_at   | -0.5 | <i>Hagh</i>      |
| 1428405_at   | -0.7 | <i>Hcfc1r1</i>   |
| 1428406_s_at | -0.6 | <i>Hcfc1r1</i>   |
| 1438328_at   | -0.7 | <i>Hcfc2</i>     |
| 1454713_s_at | 0.9  | <i>Hdc</i>       |
| 1451796_s_at | 1.1  | <i>Hdc</i>       |
| 1428823_at   | 0.6  | <i>Hdde2</i>     |
| 1415888_at   | 0.3  | <i>Hdgf</i>      |
| 1415987_at   | 0.3  | <i>Hdlbp</i>     |
| 1424522_at   | 0.5  | <i>Heatr1</i>    |
| 1434478_at   | -0.5 | <i>Heca</i>      |
| 1430287_s_at | -2.4 | <i>Hemk1</i>     |
| 1448185_at   | -0.8 | <i>Herpud1</i>   |
| 1435626_a_at | -0.6 | <i>Herpud1</i>   |
| 1439424_x_at | -0.8 | <i>Herpud2</i>   |
| 1422645_at   | 0.5  | <i>Hfe</i>       |
| 1427418_a_at | 0.3  | <i>Hif1a</i>     |
| 1416035_at   | 0.6  | <i>Hif1a</i>     |
| 1416480_a_at | 0.2  | <i>Higd1a</i>    |
| 1424017_a_at | 0.1  | <i>Hint1</i>     |
| 1455014_at   | -0.9 | <i>Hint3</i>     |
| 1418583_at   | -0.8 | <i>Hint3</i>     |
| 1424540_at   | 0.5  | <i>Hipk1</i>     |
| 1424863_a_at | 0.4  | <i>Hipk2</i>     |
| 1436994_a_at | -0.9 | <i>Hist1h1c</i>  |
| 1416101_a_at | -0.7 | <i>Hist1h1c</i>  |
| 1418072_at   | -1.1 | <i>Hist1h2bc</i> |
| 1452540_a_at | -1.2 | <i>Hist1h2bp</i> |
| 1422948_s_at | -1.2 | <i>Hist1h3a</i>  |

|              |      |                   |
|--------------|------|-------------------|
| 1428014_at   | -1   | <i>Hist1h4h</i>   |
| 1424854_at   | -1.8 | <i>Hist1h4i</i>   |
| 1418367_x_at | -1.5 | <i>Hist2h2aa1</i> |
| 1418366_at   | -1.3 | <i>Hist2h2aa1</i> |
| 1442051_at   | -2   | <i>Hist2h2aa2</i> |
| 1455095_at   | -2.3 | <i>Hist2h2be</i>  |
| 1447854_s_at | -1.8 | <i>Hist2h2be</i>  |
| 1422155_at   | -2.4 | <i>Hist2h3c2</i>  |
| 1435866_s_at | -1.2 | <i>Hist3h2a</i>   |
| 1435865_at   | -0.7 | <i>Hist3h2a</i>   |
| 1422612_at   | 0.8  | <i>Hk2</i>        |
| 1418939_at   | -0.3 | <i>Hlx</i>        |
| 1438532_at   | -1.3 | <i>Hmcn1</i>      |
| 1428920_at   | -0.8 | <i>Hmg20a</i>     |
| 1416184_s_at | 0.5  | <i>Hmga1</i>      |
| 1435324_x_at | 0.2  | <i>Hmgb1</i>      |
| 1431833_a_at | -0.7 | <i>Hmgcs2</i>     |
| 1423858_a_at | -0.5 | <i>Hmgcs2</i>     |
| 1422495_a_at | 0.1  | <i>Hmgn1</i>      |
| 1434875_a_at | 0.5  | <i>Hmgn3</i>      |
| 1428407_at   | 0.2  | <i>Hnrpa0</i>     |
| 1423531_a_at | 0.4  | <i>Hnrpa1</i>     |
| 1452712_at   | 0.3  | <i>Hnrpa3</i>     |
| 1451184_at   | 0.4  | <i>Hnrpa3</i>     |
| 1415914_at   | 0.2  | <i>Hnrpab</i>     |
| 1453849_s_at | 0.2  | <i>Hnrpab</i>     |
| 1460240_a_at | 0.2  | <i>Hnrnpc</i>     |
| 1425142_a_at | 0.6  | <i>Hnrnpd</i>     |
| 1423684_at   | 0.2  | <i>Hnrnpk</i>     |
| 1434391_at   | -0.5 | <i>Hnrnpu</i>     |
| 1423051_at   | 0.3  | <i>Hnrnpu</i>     |
| 1428224_at   | 0.4  | <i>Hnrpd1</i>     |
| 1420093_s_at | 0.5  | <i>Hnrpd1</i>     |
| 1456698_s_at | 0.5  | <i>Hnrpd1</i>     |
| 1424251_a_at | 0.6  | <i>Hnrpd1</i>     |
| 1449039_a_at | 0.7  | <i>Hnrpd1</i>     |
| 1424367_a_at | -1.3 | <i>Homer2</i>     |
| 1424859_at   | -0.9 | <i>Homer3</i>     |
| 1428662_a_at | 1.3  | <i>Hopx</i>       |
| 1452412_at   | 0.4  | <i>Hoxc8</i>      |
| 1448881_at   | 3.6  | <i>Hp</i>         |
| 1434677_at   | -0.5 | <i>Hps5</i>       |
| 1451611_at   | 0.7  | <i>Hrasls3</i>    |
| 1426922_s_at | 0.5  | <i>Hrb</i>        |
| 1428326_s_at | -0.8 | <i>Hrsp12</i>     |
| 1449038_at   | 1.2  | <i>Hsd11b1</i>    |
| 1416761_at   | 0.7  | <i>Hsd11b2</i>    |

|              |      |                  |
|--------------|------|------------------|
| 1449392_at   | -0.5 | <i>Hsd17b1</i>   |
| 1434642_at   | 0.4  | <i>Hsd17b11</i>  |
| 1455777_x_at | -0.4 | <i>Hsd17b4</i>   |
| 1417871_at   | -3.2 | <i>Hsd17b7</i>   |
| 1448865_at   | -2.6 | <i>Hsd17b7</i>   |
| 1457248_x_at | -2.1 | <i>Hsd17b7</i>   |
| 1434051_s_at | 0.4  | <i>Hspa12a</i>   |
| 1452388_at   | -2   | <i>Hspa1a</i>    |
| 1427126_at   | -2.3 | <i>Hspa1b</i>    |
| 1427127_x_at | -1.9 | <i>Hspa1b</i>    |
| 1452318_a_at | -1.7 | <i>Hspa1b</i>    |
| 1416146_at   | 0.3  | <i>Hspa4</i>     |
| 1420622_a_at | -0.5 | <i>Hspa8</i>     |
| 1447728_x_at | 0.2  | <i>Hspa9</i>     |
| 1418504_at   | 0.3  | <i>Hspa9</i>     |
| 1422943_a_at | 0.3  | <i>Hspb1</i>     |
| 1425964_x_at | 0.4  | <i>Hspb1</i>     |
| 1417013_at   | 0.5  | <i>Hspb8</i>     |
| 1423566_a_at | -1   | <i>Hsph1</i>     |
| 1425993_a_at | -0.9 | <i>Hsph1</i>     |
| 1424067_at   | 0.5  | <i>Icam1</i>     |
| 1419212_at   | 0.4  | <i>Icosl</i>     |
| 1416630_at   | -0.6 | <i>Id3</i>       |
| 1419821_s_at | -0.5 | <i>Idh1</i>      |
| 1422433_s_at | -0.4 | <i>Idh1</i>      |
| 1419647_a_at | 0.8  | <i>Ier3</i>      |
| 1426278_at   | 0.5  | <i>Ifi27</i>     |
| 1445897_s_at | 0.6  | <i>Ifi35</i>     |
| 1423555_a_at | 0.5  | <i>Ifi44</i>     |
| 1417292_at   | 2.7  | <i>Ifi47</i>     |
| 1450783_at   | 0.5  | <i>Ifit1</i>     |
| 1424254_at   | 0.8  | <i>Ifitm1</i>    |
| 1417460_at   | 0.3  | <i>Ifitm2</i>    |
| 1423754_at   | 0.7  | <i>Ifitm3</i>    |
| 1442222_at   | -1   | <i>Ifnar1</i>    |
| 1416067_at   | 0.5  | <i>Ifrd1</i>     |
| 1452014_a_at | -0.6 | <i>Igf1</i>      |
| 1424112_at   | -0.8 | <i>Igf2r</i>     |
| 1423062_at   | -1.4 | <i>Igfbp3</i>    |
| 1458268_s_at | -1.3 | <i>Igfbp3</i>    |
| 1437405_a_at | 0.2  | <i>Igfbp4</i>    |
| 1452114_s_at | 0.3  | <i>Igfbp5</i>    |
| 1417933_at   | 0.5  | <i>Igfbp6</i>    |
| 1427329_a_at | 1.5  | <i>Igh-6</i>     |
| 1429381_x_at | 1    | <i>Igh-VJ558</i> |
| 1421653_a_at | 1.2  | <i>Igh-VJ558</i> |
| 1425763_x_at | 1.3  | <i>Igh-VJ558</i> |

|              |      |                |
|--------------|------|----------------|
| 1424305_at   | 1.4  | <i>Igi</i>     |
| 1452417_x_at | 1.6  | <i>Igk</i>     |
| 1452463_x_at | 1.7  | <i>Igk</i>     |
| 1427660_x_at | 1.8  | <i>Igk</i>     |
| 1427455_x_at | 2.1  | <i>Igk</i>     |
| 1431322_at   | 0.5  | <i>Igsf3</i>   |
| 1455048_at   | 0.7  | <i>Igsf3</i>   |
| 1455049_at   | 0.9  | <i>Igsf3</i>   |
| 1417141_at   | 2.6  | <i>Igtp</i>    |
| 1419043_a_at | 2.6  | <i>Iigp1</i>   |
| 1419042_at   | 3.5  | <i>Iigp1</i>   |
| 1417793_at   | 2    | <i>Iigp2</i>   |
| 1437542_at   | -1.2 | <i>Ikzf2</i>   |
| 1419455_at   | -0.6 | <i>Il10rb</i>  |
| 1454783_at   | 0.4  | <i>Il13ra1</i> |
| 1451775_s_at | 0.7  | <i>Il13ra1</i> |
| 1417932_at   | -0.5 | <i>Il18</i>    |
| 1421034_a_at | 0.6  | <i>Il4ra</i>   |
| 1450297_at   | 1.3  | <i>Il6</i>     |
| 1452843_at   | 0.3  | <i>Il6st</i>   |
| 1454658_at   | -0.9 | <i>Ilvbl</i>   |
| 1437289_at   | -0.6 | <i>Impad1</i>  |
| 1437288_at   | -0.4 | <i>Impad1</i>  |
| 1415851_a_at | 0.1  | <i>Impdh2</i>  |
| 1439436_x_at | 0.3  | <i>Incenp</i>  |
| 1436216_s_at | -0.5 | <i>Inf2</i>    |
| 1418697_at   | 1.9  | <i>Inmt</i>    |
| 1423229_at   | -1.2 | <i>Inpp5e</i>  |
| 1460394_a_at | -0.8 | <i>Inpp11</i>  |
| 1417981_at   | -0.5 | <i>Insig2</i>  |
| 1436247_at   | -0.6 | <i>Ints2</i>   |
| 1443128_at   | -0.7 | <i>Ints6</i>   |
| 1423274_at   | -0.5 | <i>Ints6</i>   |
| 1435250_at   | -0.7 | <i>Ints8</i>   |
| 1439481_at   | 0.4  | <i>Ipo9</i>    |
| 1417379_at   | -0.5 | <i>Iqgap1</i>  |
| 1453312_at   | -0.4 | <i>Iqwd1</i>   |
| 1448436_a_at | 0.9  | <i>Irf1</i>    |
| 1435271_at   | -0.6 | <i>Irf3</i>    |
| 1418825_at   | 1.7  | <i>Irgm</i>    |
| 1418517_at   | -0.7 | <i>Irx3</i>    |
| 1421072_at   | -1.5 | <i>Irx5</i>    |
| 1431591_s_at | 0.7  | <i>Isg15</i>   |
| 1418450_at   | -0.4 | <i>Islr</i>    |
| 1415977_at   | 0.4  | <i>Isyna1</i>  |
| 1459332_at   | -1   | <i>Itch</i>    |
| 1419041_at   | -0.4 | <i>Itfg1</i>   |

|              |      |                |
|--------------|------|----------------|
| 1454966_at   | -0.9 | <i>Itga8</i>   |
| 1460285_at   | -0.9 | <i>Itga9</i>   |
| 1436755_at   | -0.8 | <i>Itih5</i>   |
| 1441946_at   | -0.8 | <i>Itih5</i>   |
| 1429159_at   | -0.7 | <i>Itih5</i>   |
| 1451047_at   | -0.5 | <i>Itm2a</i>   |
| 1423608_at   | -0.4 | <i>Itm2a</i>   |
| 1415961_at   | -0.4 | <i>Itm2c</i>   |
| 1416448_at   | 0.4  | <i>Itpa</i>    |
| 1460203_at   | 0.7  | <i>Itp1</i>    |
| 1417279_at   | 0.8  | <i>Itp1</i>    |
| 1427287_s_at | -0.6 | <i>Itp2</i>    |
| 1433805_at   | 0.2  | <i>Jak1</i>    |
| 1437106_at   | -0.6 | <i>Jarid1a</i> |
| 1427143_at   | -0.6 | <i>Jarid1b</i> |
| 1435867_at   | -1   | <i>Jhdm1d</i>  |
| 1456610_at   | -0.5 | <i>Jmjd3</i>   |
| 1451262_a_at | 0.3  | <i>Jtv1</i>    |
| 1415899_at   | 0.4  | <i>Junb</i>    |
| 1417160_s_at | 3.5  | <i>Kal1</i>    |
| 1429796_at   | -1.2 | <i>Kalrn</i>   |
| 1425991_a_at | -0.7 | <i>Kank2</i>   |
| 1456629_at   | -1.2 | <i>Kank3</i>   |
| 1416068_at   | 0.4  | <i>Kars</i>    |
| 1452700_s_at | -0.5 | <i>Kbtbd7</i>  |
| 1422835_at   | -1.1 | <i>Kcnd2</i>   |
| 1425341_at   | -1.4 | <i>Kcnk3</i>   |
| 1459971_at   | -0.6 | <i>Kcnt2</i>   |
| 1442368_at   | -1.4 | <i>Kctd12b</i> |
| 1440355_at   | -0.9 | <i>Kctd12b</i> |
| 1448302_at   | 0.3  | <i>Kctd20</i>  |
| 1453071_s_at | -0.6 | <i>Kdelc2</i>  |
| 1418538_at   | 0.4  | <i>Kdelr3</i>  |
| 1450746_at   | -0.7 | <i>Keap1</i>   |
| 1436056_at   | -1.2 | <i>Kif13b</i>  |
| 1429062_at   | -0.6 | <i>Kif16b</i>  |
| 1429063_s_at | -0.4 | <i>Kif16b</i>  |
| 1425270_at   | -0.7 | <i>Kif1b</i>   |
| 1450738_at   | -0.8 | <i>Kif21a</i>  |
| 1455029_at   | -0.6 | <i>Kif21a</i>  |
| 1440990_at   | 0.6  | <i>Kif26b</i>  |
| 1437611_x_at | 0.3  | <i>Kif2c</i>   |
| 1416199_at   | -0.8 | <i>Kifc3</i>   |
| 1416029_at   | -0.6 | <i>Klf10</i>   |
| 1429360_at   | -0.8 | <i>Klf3</i>    |
| 1454666_at   | -0.4 | <i>Klf3</i>    |
| 1419356_at   | -0.5 | <i>Klf7</i>    |



|              |      |                 |
|--------------|------|-----------------|
| 1443932_at   | -0.5 | <i>Klhdc1</i>   |
| 1428651_at   | -0.8 | <i>Klhl24</i>   |
| 1439078_at   | -0.5 | <i>Klhl4</i>    |
| 1415860_at   | 0.4  | <i>Kpna2</i>    |
| 1448526_at   | 0.2  | <i>Kpnb1</i>    |
| 1416925_at   | 0.4  | <i>Kpnb1</i>    |
| 1451979_at   | -0.6 | <i>Kras</i>     |
| 1434000_at   | -0.5 | <i>Kras</i>     |
| 1448701_a_at | -0.7 | <i>Krit1</i>    |
| 1448169_at   | 1    | <i>Krt18</i>    |
| 1423952_a_at | 1    | <i>Krt7</i>     |
| 1420647_a_at | 1    | <i>Krt8</i>     |
| 1423691_x_at | 1.1  | <i>Krt8</i>     |
| 1435989_x_at | 1.2  | <i>Krt8</i>     |
| 1455434_a_at | 0.3  | <i>Ktn1</i>     |
| 1434246_at   | -0.4 | <i>L3mbt3</i>   |
| 1424113_at   | 0.3  | <i>Lamb1-1</i>  |
| 1424114_s_at | 0.3  | <i>Lamb1-1</i>  |
| 1450860_at   | 0.4  | <i>Lap3</i>     |
| 1416148_at   | 0.5  | <i>Laptm4b</i>  |
| 1437177_at   | -0.6 | <i>Larp4</i>    |
| 1419678_at   | -1.1 | <i>Lats2</i>    |
| 1415829_at   | 0.5  | <i>Lbr</i>      |
| 1427747_a_at | 1.2  | <i>Lcn2</i>     |
| 1455121_at   | -0.9 | <i>Lcor</i>     |
| 1429633_at   | -0.6 | <i>Lcor</i>     |
| 1439272_at   | -0.5 | <i>Lcorl</i>    |
| 1415983_at   | 0.5  | <i>Lcp1</i>     |
| 1439557_s_at | -0.9 | <i>Ldb2</i>     |
| 1456786_at   | -0.8 | <i>Ldb2</i>     |
| 1421101_a_at | -0.6 | <i>Ldb2</i>     |
| 1419737_a_at | 0.3  | <i>Ldha</i>     |
| 1428614_at   | 0.7  | <i>Ldhd</i>     |
| 1456156_at   | 0.4  | <i>Lepr</i>     |
| 1425644_at   | 0.9  | <i>Lepr</i>     |
| 1421462_a_at | 0.3  | <i>Lepre1</i>   |
| 1419573_a_at | 0.2  | <i>Lgals1</i>   |
| 1455439_a_at | 0.2  | <i>Lgals1</i>   |
| 1426808_at   | -0.7 | <i>Lgals3</i>   |
| 1448380_at   | 0.3  | <i>Lgals3bp</i> |
| 1421217_a_at | 0.5  | <i>Lgals9</i>   |
| 1448883_at   | -0.5 | <i>Lgmn</i>     |
| 1433891_at   | -0.5 | <i>Lgr4</i>     |
| 1427028_at   | -0.3 | <i>Lgr6</i>     |
| 1450192_at   | -0.7 | <i>Lhcgr</i>    |
| 1434129_s_at | -0.5 | <i>Ljfp12</i>   |
| 1420394_s_at | 0.4  | <i>Lilrb4</i>   |

|              |      |                |
|--------------|------|----------------|
| 1434161_at   | -0.6 | <i>Lin52</i>   |
| 1450872_s_at | -0.3 | <i>Lipa</i>    |
| 1421262_at   | -1   | <i>Lipg</i>    |
| 1450188_s_at | -1   | <i>Lipg</i>    |
| 1416303_at   | 0.3  | <i>Litaf</i>   |
| 1428130_at   | -0.7 | <i>Lman1</i>   |
| 1455617_at   | -0.5 | <i>Lmbrd1</i>  |
| 1421654_a_at | 0.4  | <i>Lmna</i>    |
| 1438432_at   | -0.3 | <i>Lupep</i>   |
| 1448228_at   | 0.3  | <i>Lox</i>     |
| 1448606_at   | 0.7  | <i>Lpar1</i>   |
| 1435327_at   | 0.3  | <i>Lpgat1</i>  |
| 1435326_at   | 0.4  | <i>Lpgat1</i>  |
| 1418288_at   | -1.1 | <i>Lpin1</i>   |
| 1431056_a_at | 0.8  | <i>Lpl</i>     |
| 1415904_at   | 1    | <i>Lpl</i>     |
| 1438271_at   | -0.9 | <i>Lpp</i>     |
| 1417290_at   | 1.5  | <i>Lrg1</i>    |
| 1449893_a_at | 0.5  | <i>Lrig1</i>   |
| 1433536_at   | -1.3 | <i>Lrp11</i>   |
| 1427125_s_at | 0.7  | <i>Lrrc41</i>  |
| 1416234_at   | 0.4  | <i>Lrrc59</i>  |
| 1433842_at   | 0.3  | <i>Lrrfip1</i> |
| 1416053_at   | -1.3 | <i>Lrrn1</i>   |
| 1448536_at   | 0.4  | <i>Lsm3</i>    |
| 1451255_at   | -0.9 | <i>Lsr</i>     |
| 1447547_at   | -1.3 | <i>Ltbp1</i>   |
| 1448870_at   | -1.3 | <i>Ltbp1</i>   |
| 1418061_at   | -0.9 | <i>Ltbp2</i>   |
| 1438312_s_at | -0.5 | <i>Ltbp3</i>   |
| 1418049_at   | -0.4 | <i>Ltbp3</i>   |
| 1436665_a_at | -0.4 | <i>Ltbp4</i>   |
| 1450009_at   | 0.7  | <i>Ltf</i>     |
| 1436767_at   | -0.8 | <i>Luc7l2</i>  |
| 1436766_at   | -0.7 | <i>Luc7l2</i>  |
| 1423607_at   | -0.5 | <i>Lum</i>     |
| 1417185_at   | 1.4  | <i>Ly6a</i>    |
| 1416930_at   | 1.6  | <i>Ly6d</i>    |
| 1453304_s_at | 0.5  | <i>Ly6e</i>    |
| 1452855_at   | 1.1  | <i>Ly6k</i>    |
| 1417511_at   | 0.6  | <i>Lyar</i>    |
| 1417283_at   | 1.3  | <i>Lynx1</i>   |
| 1441952_x_at | 1.3  | <i>Lynx1</i>   |
| 1423704_at   | 0.5  | <i>Lypla3</i>  |
| 1429379_at   | 0.7  | <i>Lyve1</i>   |
| 1453128_at   | 0.7  | <i>Lyve1</i>   |
| 1436996_x_at | 0.6  | <i>Lyz1</i>    |

|              |      |                  |
|--------------|------|------------------|
| 1423547_at   | 0.8  | <i>Lyz2</i>      |
| 1417170_at   | -0.5 | <i>Lztfl1</i>    |
| 1437473_at   | -1.6 | <i>Maf</i>       |
| 1456060_at   | -1   | <i>Maf</i>       |
| 1435828_at   | -0.7 | <i>Maf</i>       |
| 1447849_s_at | -0.7 | <i>Maf</i>       |
| 1426306_a_at | -0.4 | <i>Maged2</i>    |
| 1435461_at   | -0.6 | <i>Magi3</i>     |
| 1452378_at   | -1.8 | <i>Malat1</i>    |
| 1438403_s_at | -1.5 | <i>Malat1</i>    |
| 1418189_s_at | -1.3 | <i>Malat1</i>    |
| 1436202_at   | -1.3 | <i>Malat1</i>    |
| 1418188_a_at | -1.2 | <i>Malat1</i>    |
| 1416351_at   | 0.3  | <i>Map2k1</i>    |
| 1422615_at   | 0.5  | <i>Map4k4</i>    |
| 1452798_s_at | -0.6 | <i>Mapk1ip1</i>  |
| 1429784_at   | -0.8 | <i>Mapk1ip1l</i> |
| 1419169_at   | 0.4  | <i>Mapk6</i>     |
| 1426648_at   | 0.5  | <i>Mapkapk2</i>  |
| 1428820_at   | -0.5 | <i>Mapre1</i>    |
| 1451989_a_at | -0.5 | <i>Mapre2</i>    |
| 1459871_x_at | -1.4 | <i>2-Mar</i>     |
| 1436614_at   | 0.7  | <i>3-Mar</i>     |
| 1440966_at   | -1.1 | <i>7-Mar</i>     |
| 1455951_at   | 0.5  | <i>Mars</i>      |
| 1439381_x_at | -0.5 | <i>Marveld1</i>  |
| 1423667_at   | 0.2  | <i>Mat2a</i>     |
| 1438630_x_at | 0.3  | <i>Mat2a</i>     |
| 1458508_at   | -1.1 | <i>Matr3</i>     |
| 1417968_a_at | 0.5  | <i>Mbd1</i>      |
| 1453678_at   | 1.6  | <i>Mbd1</i>      |
| 1434140_at   | -1.3 | <i>Mcf2l</i>     |
| 1448777_at   | 0.4  | <i>Mcm2</i>      |
| 1420028_s_at | 0.5  | <i>Mcm3</i>      |
| 1436708_x_at | 0.2  | <i>Mcm4</i>      |
| 1416214_at   | 0.4  | <i>Mcm4</i>      |
| 1436808_x_at | 0.5  | <i>Mcm5</i>      |
| 1438852_x_at | 0.3  | <i>Mcm6</i>      |
| 1416251_at   | 0.4  | <i>Mcm6</i>      |
| 1416030_a_at | 0.4  | <i>Mcm7</i>      |
| 1438320_s_at | 0.4  | <i>Mcm7</i>      |
| 1438338_at   | -0.7 | <i>Mdh1</i>      |
| 1433984_a_at | 0.2  | <i>Mdh2</i>      |
| 1421907_at   | -0.9 | <i>Med1</i>      |
| 1431423_a_at | 0.4  | <i>Med8</i>      |
| 1427186_a_at | -0.6 | <i>Mef2a</i>     |
| 1452347_at   | -0.4 | <i>Mef2a</i>     |

|              |      |                |
|--------------|------|----------------|
| 1421028_a_at | -1.4 | <i>Mef2c</i>   |
| 1451507_at   | -1   | <i>Mef2c</i>   |
| 1421027_a_at | -0.8 | <i>Mef2c</i>   |
| 1429841_at   | -2.6 | <i>Megf10</i>  |
| 1433968_a_at | -0.7 | <i>Megf9</i>   |
| 1457632_s_at | 0.2  | <i>Meis2</i>   |
| 1434447_at   | 0.7  | <i>Met</i>     |
| 1428900_s_at | -0.6 | <i>Mett5d1</i> |
| 1447683_x_at | 0.5  | <i>Mettl1</i>  |
| 1437152_at   | -0.6 | <i>Mex3b</i>   |
| 1417359_at   | -0.6 | <i>Mfap2</i>   |
| 1428804_at   | -0.6 | <i>Mfap3l</i>  |
| 1449082_at   | -1.1 | <i>Mfap5</i>   |
| 1418454_at   | -0.9 | <i>Mfap5</i>   |
| 1420911_a_at | -0.5 | <i>Mfge8</i>   |
| 1436021_at   | -2.2 | <i>Mfsd4</i>   |
| 1455531_at   | -2   | <i>Mfsd4</i>   |
| 1424720_at   | -0.5 | <i>Mgat4b</i>  |
| 1452592_at   | -1.6 | <i>Mgst2</i>   |
| 1448300_at   | -0.7 | <i>Mgst3</i>   |
| 1416840_at   | 0.4  | <i>Mid1ip1</i> |
| 1422216_at   | -1   | <i>Mid2</i>    |
| 1416335_at   | 0.2  | <i>Mif</i>     |
| 1426817_at   | 0.4  | <i>Mki67</i>   |
| 1429570_at   | 0.7  | <i>Mlkl</i>    |
| 1434178_at   | -0.7 | <i>Mll3</i>    |
| 1427150_at   | -0.6 | <i>Mll3</i>    |
| 1439107_a_at | -0.5 | <i>Mll5</i>    |
| 1416313_at   | -0.8 | <i>Mllt11</i>  |
| 1426369_at   | 0.3  | <i>Mlstd2</i>  |
| 1423488_at   | 0.5  | <i>Mmd</i>     |
| 1455961_at   | 0.4  | <i>Mme</i>     |
| 1417234_at   | -0.7 | <i>Mmp11</i>   |
| 1416572_at   | -0.5 | <i>Mmp14</i>   |
| 1437260_at   | -0.6 | <i>Mmrn1</i>   |
| 1456768_a_at | -0.5 | <i>Mmrn2</i>   |
| 1438676_at   | 2.3  | <i>Mpa2l</i>   |
| 1447927_at   | 2.3  | <i>Mpa2l</i>   |
| 1427076_at   | 1    | <i>Mpeg1</i>   |
| 1434954_at   | -0.9 | <i>Mpp5</i>    |
| 1449348_at   | 0.8  | <i>Mpp6</i>    |
| 1416236_a_at | 1.5  | <i>Mpzl2</i>   |
| 1451371_at   | 0.6  | <i>Mrap</i>    |
| 1437250_at   | 0.9  | <i>Mreg</i>    |
| 1416496_at   | 0.2  | <i>Mrfap1</i>  |
| 1452048_at   | 0.3  | <i>Mrpl12</i>  |
| 1430798_x_at | 0.8  | <i>Mrpl15</i>  |

|              |      |                |
|--------------|------|----------------|
| 1448811_at   | 0.6  | <i>Mrpl2</i>   |
| 1422464_at   | 0.3  | <i>Mrpl3</i>   |
| 1428588_a_at | 0.3  | <i>Mrpl41</i>  |
| 1460701_a_at | 0.2  | <i>Mrpl52</i>  |
| 1448869_a_at | 0.3  | <i>Mrps16</i>  |
| 1421875_a_at | 0.4  | <i>Mrps23</i>  |
| 1427158_at   | 0.2  | <i>Mrps30</i>  |
| 1459665_s_at | -0.3 | <i>Mrvi1</i>   |
| 1418990_at   | 0.6  | <i>Ms4a4d</i>  |
| 1418826_at   | 0.8  | <i>Ms4a6b</i>  |
| 1450234_at   | 0.7  | <i>Ms4a6c</i>  |
| 1419598_at   | 0.8  | <i>Ms4a6d</i>  |
| 1419599_s_at | 0.8  | <i>Ms4a6d</i>  |
| 1452287_at   | 0.4  | <i>Msi1</i>    |
| 1460238_at   | 0.5  | <i>Msln</i>    |
| 1422557_s_at | 0.8  | <i>Mt1</i>     |
| 1428942_at   | 1.1  | <i>Mt2</i>     |
| 1450397_at   | -1.4 | <i>Mtap1b</i>  |
| 1434194_at   | -1.3 | <i>Mtap2</i>   |
| 1424908_at   | -0.8 | <i>Mtfmt</i>   |
| 1419254_at   | -0.5 | <i>Mthfd2</i>  |
| 1434087_at   | -0.5 | <i>Mthfr</i>   |
| 1460257_a_at | -0.5 | <i>Mthfs</i>   |
| 1456540_s_at | -0.4 | <i>Mtmr6</i>   |
| 1454824_s_at | -0.5 | <i>Mtus1</i>   |
| 1436501_at   | -0.4 | <i>Mtus1</i>   |
| 1420465_s_at | 6    | <i>Mup1</i>    |
| 1448486_at   | -0.3 | <i>Mut</i>     |
| 1417303_at   | -0.3 | <i>Mvd</i>     |
| 1434378_a_at | -0.8 | <i>Mxd4</i>    |
| 1450376_at   | -0.4 | <i>Mxi1</i>    |
| 1423430_at   | 0.4  | <i>Mybbp1a</i> |
| 1423431_a_at | 0.4  | <i>Mybbp1a</i> |
| 1445340_at   | -1   | <i>Mycbp2</i>  |
| 1434274_at   | -0.7 | <i>Mycbp2</i>  |
| 1447150_at   | -0.7 | <i>Mycbp2</i>  |
| 1434937_at   | -0.5 | <i>Mycbp2</i>  |
| 1454900_s_at | -0.5 | <i>Mycbp2</i>  |
| 1447584_s_at | -1.2 | <i>Myct1</i>   |
| 1419649_s_at | 0.1  | <i>Myo1c</i>   |
| 1452298_a_at | 0.6  | <i>Myo5b</i>   |
| 1435559_at   | -0.9 | <i>Myo6</i>    |
| 1421385_a_at | -0.7 | <i>Myo7a</i>   |
| 1425978_at   | -0.8 | <i>Myocd</i>   |
| 1423508_at   | -0.5 | <i>Myst4</i>   |
| 1446957_s_at | -0.8 | <i>N4bp1</i>   |
| 1418154_at   | -0.7 | <i>N4bp1</i>   |

|              |      |               |
|--------------|------|---------------|
| 1448430_a_at | 0.2  | <i>Naca</i>   |
| 1455320_at   | -0.5 | <i>Nampt</i>  |
| 1420478_at   | 0.3  | <i>Nap111</i> |
| 1429227_x_at | 0.3  | <i>Nap111</i> |
| 1452778_x_at | 0.4  | <i>Nap111</i> |
| 1418046_at   | -4.4 | <i>Nap112</i> |
| 1426536_at   | -0.7 | <i>Narg2</i>  |
| 1442027_at   | -0.9 | <i>Nbeal1</i> |
| 1448343_a_at | -0.5 | <i>Nbr1</i>   |
| 1417568_at   | -0.4 | <i>Ncald</i>  |
| 1436707_x_at | 0.4  | <i>Ncaph</i>  |
| 1429477_at   | -1.4 | <i>Ncaph2</i> |
| 1415773_at   | 0.2  | <i>Ncl</i>    |
| 1456528_x_at | 0.3  | <i>Ncl</i>    |
| 1415771_at   | 0.5  | <i>Ncl</i>    |
| 1435233_at   | -0.4 | <i>Ncoa2</i>  |
| 1423201_at   | -0.6 | <i>Ncor1</i>  |
| 1452066_a_at | -0.5 | <i>Ndfip2</i> |
| 1417663_a_at | -0.5 | <i>Ndrg3</i>  |
| 1416494_at   | -0.4 | <i>Ndufs5</i> |
| 1423596_at   | 0.4  | <i>Nek6</i>   |
| 1418932_at   | 0.4  | <i>Nfil3</i>  |
| 1420088_at   | 0.2  | <i>Nfkbia</i> |
| 1448306_at   | 0.3  | <i>Nfkbia</i> |
| 1416373_at   | -0.8 | <i>Nfs1</i>   |
| 1428248_at   | 0.4  | <i>Nfx1</i>   |
| 1448963_at   | 0.4  | <i>Nfyc</i>   |
| 1438318_x_at | 0.4  | <i>Ngdn</i>   |
| 1449377_at   | -0.8 | <i>Nicn1</i>  |
| 1448480_at   | 0.5  | <i>Nip7</i>   |
| 1430309_at   | -0.7 | <i>Nipbl</i>  |
| 1433757_a_at | -1.5 | <i>Nisch</i>  |
| 1437238_x_at | 0.4  | <i>Nmd3</i>   |
| 1425719_a_at | 0.7  | <i>Nmi</i>    |
| 1423506_a_at | 0.5  | <i>Nnat</i>   |
| 1432517_a_at | 1.7  | <i>Nnmt</i>   |
| 1456573_x_at | -0.6 | <i>Nnt</i>    |
| 1416105_at   | -0.4 | <i>Nnt</i>    |
| 1437500_at   | 0.5  | <i>Noc3l</i>  |
| 1438095_x_at | 0.3  | <i>Noc4l</i>  |
| 1443794_x_at | 0.6  | <i>Noc4l</i>  |
| 1423453_at   | 0.3  | <i>Nol12</i>  |
| 1426533_at   | 0.5  | <i>Nol5a</i>  |
| 1455035_s_at | 0.5  | <i>Nol5a</i>  |
| 1428870_at   | 0.2  | <i>Nolc1</i>  |
| 1428869_at   | 0.6  | <i>Nolc1</i>  |
| 1431239_at   | -0.7 | <i>Nono</i>   |

|              |      |                |
|--------------|------|----------------|
| 1416474_at   | -0.7 | <i>Nope</i>    |
| 1422622_at   | -0.8 | <i>Nos3</i>    |
| 1421965_s_at | -0.9 | <i>Notch3</i>  |
| 1416901_at   | -0.5 | <i>Npc2</i>    |
| 1432416_a_at | 0.1  | <i>Npm1</i>    |
| 1452106_at   | -1.4 | <i>Npnt</i>    |
| 1452107_s_at | -1.2 | <i>Npnt</i>    |
| 1449160_at   | -0.8 | <i>Npr1</i>    |
| 1416958_at   | -0.4 | <i>Nr1d2</i>   |
| 1455034_at   | 0.3  | <i>Nr4a2</i>   |
| 1438796_at   | 1.3  | <i>Nr4a3</i>   |
| 1420410_at   | -0.4 | <i>Nr5a2</i>   |
| 1424544_at   | -0.8 | <i>Nrbp2</i>   |
| 1430583_at   | -0.8 | <i>Nrcam</i>   |
| 1434709_at   | -0.4 | <i>Nrcam</i>   |
| 1418469_at   | -0.8 | <i>Nrip1</i>   |
| 1449089_at   | -0.6 | <i>Nrip1</i>   |
| 1433792_at   | -1.1 | <i>Nrip2</i>   |
| 1428393_at   | -0.9 | <i>Nrn1</i>    |
| 1423850_at   | 0.6  | <i>Nsun2</i>   |
| 1440353_at   | -2   | <i>Ntf5</i>    |
| 1422860_at   | 1.1  | <i>Nts</i>     |
| 1438684_at   | 0.3  | <i>Nuak1</i>   |
| 1418905_at   | 0.6  | <i>Nubp1</i>   |
| 1418355_at   | 0.6  | <i>Nucb2</i>   |
| 1419472_s_at | 0.4  | <i>Nudc</i>    |
| 1453139_at   | -1.3 | <i>Nudt12</i>  |
| 1424753_at   | -0.7 | <i>Nudt14</i>  |
| 1435902_at   | -0.9 | <i>Nudt18</i>  |
| 1428164_at   | 0.3  | <i>Nudt9</i>   |
| 1455387_at   | -0.4 | <i>Nufip2</i>  |
| 1415925_a_at | 0.2  | <i>Nup62</i>   |
| 1447905_x_at | 0.4  | <i>Nup62</i>   |
| 1415926_at   | 0.7  | <i>Nup62</i>   |
| 1439154_at   | 0.3  | <i>Nup98</i>   |
| 1422465_a_at | 0.8  | <i>Nxn</i>     |
| 1453196_a_at | 0.7  | <i>Oasl2</i>   |
| 1436741_at   | -0.7 | <i>Obox5</i>   |
| 1448873_at   | -0.8 | <i>Ocln</i>    |
| 1437711_x_at | 0.4  | <i>Odc1</i>    |
| 1438761_a_at | 0.8  | <i>Odc1</i>    |
| 1427364_a_at | 1.2  | <i>Odc1</i>    |
| 1425516_at   | -0.7 | <i>Ogt</i>     |
| 1451738_at   | -0.7 | <i>Ogt</i>     |
| 1460631_at   | -0.5 | <i>Ogt</i>     |
| 1460044_at   | -3   | <i>Onecut2</i> |
| 1444980_at   | -2.6 | <i>Onecut2</i> |

|              |      |                |
|--------------|------|----------------|
| 1456063_at   | -1   | <i>ORF34</i>   |
| 1451219_at   | -0.7 | <i>Ormdl1</i>  |
| 1418674_at   | 0.6  | <i>Osmr</i>    |
| 1452246_at   | -0.4 | <i>Ostf1</i>   |
| 1426526_s_at | 1.8  | <i>Ovgp1</i>   |
| 1436750_a_at | -0.4 | <i>Oxct1</i>   |
| 1418501_a_at | -0.4 | <i>Oxr1</i>    |
| 1440888_at   | -1.3 | <i>Oxtr</i>    |
| 1435372_a_at | 0.4  | <i>Pa2g4</i>   |
| 1420142_s_at | 0.8  | <i>Pa2g4</i>   |
| 1422850_at   | -0.8 | <i>Pabpn1</i>  |
| 1417923_at   | -1.3 | <i>Pak3</i>    |
| 1435486_at   | -1.1 | <i>Pak3</i>    |
| 1437318_at   | -0.8 | <i>Pak3</i>    |
| 1455200_at   | -0.6 | <i>Pak6</i>    |
| 1418908_at   | -0.6 | <i>Pam</i>     |
| 1437883_s_at | -1.4 | <i>Pan3</i>    |
| 1457110_at   | -1.1 | <i>Pank1</i>   |
| 1418715_at   | -0.4 | <i>Pank1</i>   |
| 1431028_a_at | -0.4 | <i>Pank1</i>   |
| 1427241_at   | -0.6 | <i>Pap0lg</i>  |
| 1432591_at   | -0.9 | <i>Pappa</i>   |
| 1452178_at   | 0.4  | <i>Parp10</i>  |
| 1426774_at   | 0.6  | <i>Parp12</i>  |
| 1426950_at   | -0.9 | <i>Parp16</i>  |
| 1451969_s_at | 0.6  | <i>Parp3</i>   |
| 1451474_a_at | -0.7 | <i>Parp8</i>   |
| 1416897_at   | 1.1  | <i>Parp9</i>   |
| 1438672_at   | -1   | <i>Parvb</i>   |
| 1451405_at   | -0.4 | <i>Pcca</i>    |
| 1456214_at   | -0.6 | <i>Pcdh7</i>   |
| 1437442_at   | -0.5 | <i>Pcdh7</i>   |
| 1435635_at   | -1.5 | <i>Pcmd1</i>   |
| 1455388_at   | -1   | <i>Pcmd1</i>   |
| 1435634_at   | -0.9 | <i>Pcmd1</i>   |
| 1427074_at   | -0.8 | <i>Pcmd2</i>   |
| 1427075_s_at | -0.7 | <i>Pcmd2</i>   |
| 1417947_at   | 0.2  | <i>Pcna</i>    |
| 1437339_s_at | 0.3  | <i>Pcsk5</i>   |
| 1451406_a_at | 0.4  | <i>Pcsk5</i>   |
| 1421957_a_at | -0.7 | <i>Pcyt1a</i>  |
| 1418840_at   | 0.3  | <i>Pdcd4</i>   |
| 1448155_at   | -0.6 | <i>Pdcd6ip</i> |
| 1433694_at   | 0.2  | <i>Pde3b</i>   |
| 1436970_a_at | -0.7 | <i>Pdgfrb</i>  |
| 1416497_at   | -0.4 | <i>Pdia4</i>   |
| 1423648_at   | 0.2  | <i>Pdia6</i>   |



|              |      |                |
|--------------|------|----------------|
| 1423747_a_at | 0.4  | <i>Pdk1</i>    |
| 1423946_at   | -0.8 | <i>Pdlim2</i>  |
| 1422861_s_at | -0.7 | <i>Pdlim5</i>  |
| 1450786_x_at | -0.6 | <i>Pdlim5</i>  |
| 1427929_a_at | 1.2  | <i>Pdxk</i>    |
| 1439088_at   | -0.6 | <i>Pdzd8</i>   |
| 1416846_a_at | 0.9  | <i>Pdzrn3</i>  |
| 1431061_s_at | -0.9 | <i>Peli1</i>   |
| 1428716_at   | -2.2 | <i>Pex1</i>    |
| 1416780_at   | -0.4 | <i>Pfkm</i>    |
| 1449018_at   | 0.2  | <i>Pfn1</i>    |
| 1418209_a_at | 0.3  | <i>Pfn2</i>    |
| 1418210_at   | 0.3  | <i>Pfn2</i>    |
| 1423706_a_at | 0.3  | <i>Pgd</i>     |
| 1436771_x_at | 0.3  | <i>Pgd</i>     |
| 1437380_x_at | 0.3  | <i>Pgd</i>     |
| 1438627_x_at | 0.3  | <i>Pgd</i>     |
| 1438640_x_at | 0.2  | <i>Pgk1</i>    |
| 1439435_x_at | 0.2  | <i>Pgk1</i>    |
| 1417864_at   | 0.3  | <i>Pgk1</i>    |
| 1455229_x_at | 0.6  | <i>Pgs1</i>    |
| 1455345_at   | 0.6  | <i>Phf15</i>   |
| 1418960_at   | -0.6 | <i>Phf2011</i> |
| 1457264_at   | -0.6 | <i>Phf2011</i> |
| 1456871_a_at | -0.5 | <i>Phf2011</i> |
| 1434511_at   | -0.8 | <i>Phkb</i>    |
| 1421704_a_at | -0.8 | <i>Pik3c2g</i> |
| 1435458_at   | 0.7  | <i>Pim1</i>    |
| 1437100_x_at | 0.5  | <i>Pim3</i>    |
| 1450389_s_at | -0.3 | <i>Pip5k1b</i> |
| 1419757_at   | -0.9 | <i>Pitpnm2</i> |
| 1426453_at   | 0.2  | <i>Pitrm1</i>  |
| 1417785_at   | 0.6  | <i>Pla1a</i>   |
| 1448558_a_at | 0.5  | <i>Pla2g4a</i> |
| 1451335_at   | 1    | <i>Plac8</i>   |
| 1448748_at   | 1.1  | <i>Plek</i>    |
| 1417965_at   | -0.4 | <i>Plekha1</i> |
| 1425543_s_at | -0.7 | <i>Plekha5</i> |
| 1424671_at   | -0.5 | <i>Plekhf1</i> |
| 1457145_at   | -1.4 | <i>Plekhg4</i> |
| 1448191_at   | 0.8  | <i>Plk1</i>    |
| 1427005_at   | -0.6 | <i>Plk2</i>    |
| 1416687_at   | 0.2  | <i>Plod2</i>   |
| 1416686_at   | 0.4  | <i>Plod2</i>   |
| 1448282_at   | 0.4  | <i>Plrg1</i>   |
| 1453181_x_at | -0.6 | <i>Plscr1</i>  |
| 1424902_at   | -1.5 | <i>Plxdc1</i>  |

|              |      |                 |
|--------------|------|-----------------|
| 1453286_at   | -0.5 | <i>Plxna2</i>   |
| 1435254_at   | -0.5 | <i>Plxnb1</i>   |
| 1457883_at   | -1   | <i>Pm20d2</i>   |
| 1450735_at   | 0.3  | <i>Pno1</i>     |
| 1416530_a_at | 0.7  | <i>Pnp1</i>     |
| 1416187_s_at | -0.5 | <i>Pnrc2</i>    |
| 1416186_at   | -0.4 | <i>Pnrc2</i>    |
| 1439840_at   | -1.2 | <i>Polb</i>     |
| 1434229_a_at | -0.5 | <i>Polb</i>     |
| 1455788_x_at | 0.2  | <i>Poldip3</i>  |
| 1434176_x_at | 0.3  | <i>Poldip3</i>  |
| 1437335_x_at | 0.3  | <i>Poldip3</i>  |
| 1437837_x_at | 0.3  | <i>Poldip3</i>  |
| 1449483_at   | -1.2 | <i>Polk</i>     |
| 1419058_at   | 0.7  | <i>Polr1e</i>   |
| 1435057_x_at | 0.8  | <i>Polr1e</i>   |
| 1415754_at   | 0.3  | <i>Polr2f</i>   |
| 1416979_at   | 0.2  | <i>Pomp</i>     |
| 1416933_at   | 0.4  | <i>Por</i>      |
| 1423606_at   | 0.4  | <i>Postn</i>    |
| 1416939_at   | 0.6  | <i>Ppa1</i>     |
| 1428344_at   | -0.7 | <i>Ppapdc2</i>  |
| 1438955_x_at | 0.8  | <i>Ppif</i>     |
| 1424136_a_at | 0.4  | <i>Ppih</i>     |
| 1415678_at   | 0.2  | <i>Ppm1a</i>    |
| 1434990_at   | -0.9 | <i>Ppm1e</i>    |
| 1452973_at   | -0.8 | <i>Ppm1k</i>    |
| 1438201_at   | -0.9 | <i>Ppm2c</i>    |
| 1434228_at   | -0.4 | <i>Ppm2c</i>    |
| 1452046_a_at | -0.4 | <i>Ppp1cc</i>   |
| 1450914_at   | 0.2  | <i>Ppp1r14b</i> |
| 1433691_at   | 0.4  | <i>Ppp1r3c</i>  |
| 1424554_at   | 0.6  | <i>Ppp1r8</i>   |
| 1417367_at   | 0.1  | <i>Ppp2ca</i>   |
| 1452788_at   | -0.9 | <i>Ppp2r5e</i>  |
| 1428463_a_at | -0.7 | <i>Ppp2r5e</i>  |
| 1422468_at   | -0.7 | <i>Ppt1</i>     |
| 1422467_at   | -0.6 | <i>Ppt1</i>     |
| 1423775_s_at | 0.5  | <i>Prc1</i>     |
| 1436651_at   | -0.8 | <i>Prdm11</i>   |
| 1433866_x_at | -0.4 | <i>Prdx1</i>    |
| 1416292_at   | -0.5 | <i>Prdx3</i>    |
| 1416167_at   | 0.2  | <i>Prdx4</i>    |
| 1416381_a_at | 0.6  | <i>Prdx5</i>    |
| 1439942_at   | 0.3  | <i>Prep</i>     |
| 1428808_at   | -0.6 | <i>Prickle2</i> |
| 1438664_at   | 0.4  | <i>Prkar2b</i>  |

|              |      |                |
|--------------|------|----------------|
| 1456475_s_at | 0.4  | <i>Prkar2b</i> |
| 1430640_a_at | 0.6  | <i>Prkar2b</i> |
| 1426614_at   | -0.3 | <i>Prkcbp1</i> |
| 1435460_at   | 0.8  | <i>Prkg2</i>   |
| 1435162_at   | 1.1  | <i>Prkg2</i>   |
| 1425853_s_at | -1.1 | <i>Prlr</i>    |
| 1448556_at   | -0.9 | <i>Prlr</i>    |
| 1437397_at   | -0.8 | <i>Prlr</i>    |
| 1441102_at   | -0.8 | <i>Prlr</i>    |
| 1421382_at   | -0.3 | <i>Prlr</i>    |
| 1452787_a_at | 0.5  | <i>Prmt1</i>   |
| 1437234_x_at | -0.5 | <i>Prmt2</i>   |
| 1416844_at   | -0.4 | <i>Prmt2</i>   |
| 1416130_at   | -0.3 | <i>Prnp</i>    |
| 1419839_x_at | 0.3  | <i>Prpf19</i>  |
| 1420916_at   | 0.1  | <i>Prpf40a</i> |
| 1455696_a_at | -0.8 | <i>Prpf4b</i>  |
| 1436427_at   | -0.6 | <i>Prpf4b</i>  |
| 1454789_x_at | 0.2  | <i>Prpf6</i>   |
| 1416052_at   | 0.8  | <i>Prps1</i>   |
| 1423686_a_at | -0.5 | <i>Prr13</i>   |
| 1455724_at   | -1.6 | <i>Prrg1</i>   |
| 1434138_at   | -0.5 | <i>Prune</i>   |
| 1451064_a_at | 0.7  | <i>Psat1</i>   |
| 1454607_s_at | 0.7  | <i>Psat1</i>   |
| 1448442_a_at | 0.3  | <i>Psm3</i>    |
| 1460339_at   | 0.2  | <i>Psm4</i>    |
| 1416506_at   | 0.2  | <i>Psm6</i>    |
| 1437144_x_at | 0.2  | <i>Psm6</i>    |
| 1423568_at   | 0.3  | <i>Psm7</i>    |
| 1448632_at   | 1.3  | <i>Psm10</i>   |
| 1460198_a_at | 0.2  | <i>Psm3</i>    |
| 1451205_at   | 0.2  | <i>Psm4</i>    |
| 1422962_a_at | 2.2  | <i>Psm8</i>    |
| 1450696_at   | 2.5  | <i>Psm9</i>    |
| 1435859_x_at | 0.2  | <i>Psmc2</i>   |
| 1426611_at   | 0.3  | <i>Psmc2</i>   |
| 1416282_at   | 0.3  | <i>Psmc3</i>   |
| 1416290_a_at | 0.2  | <i>Psmc4</i>   |
| 1416291_at   | 0.4  | <i>Psmc4</i>   |
| 1415740_at   | 0.3  | <i>Psmc5</i>   |
| 1422459_a_at | 0.4  | <i>Psm13</i>   |
| 1448479_at   | 0.4  | <i>Psm3</i>    |
| 1425859_a_at | 0.1  | <i>Psm4</i>    |
| 1418874_a_at | 0.3  | <i>Psm4</i>    |
| 1417056_at   | 0.3  | <i>Psm1</i>    |
| 1417189_at   | 0.6  | <i>Psm2</i>    |

|              |      |                |
|--------------|------|----------------|
| 1423192_at   | 0.3  | <i>Pspc1</i>   |
| 1424874_a_at | 0.3  | <i>Ptbp1</i>   |
| 1422553_at   | -1.1 | <i>Pten</i>    |
| 1449310_at   | -0.7 | <i>Ptger2</i>  |
| 1450344_a_at | 0.7  | <i>Ptger3</i>  |
| 1453924_a_at | -2.7 | <i>Ptgfr</i>   |
| 1420349_at   | -2.6 | <i>Ptgfr</i>   |
| 1446331_at   | -2.6 | <i>Ptgfr</i>   |
| 1449828_at   | -2.4 | <i>Ptgfr</i>   |
| 1440777_x_at | -1.8 | <i>Ptgfr</i>   |
| 1423414_at   | 0.8  | <i>Ptgs1</i>   |
| 1436448_a_at | 0.8  | <i>Ptgs1</i>   |
| 1417262_at   | 1.3  | <i>Ptgs2</i>   |
| 1417263_at   | 2    | <i>Ptgs2</i>   |
| 1452427_s_at | -0.7 | <i>Ptplad1</i> |
| 1449342_at   | 0.3  | <i>Ptplb</i>   |
| 1455359_at   | -0.6 | <i>Ptpn14</i>  |
| 1417140_a_at | 0.5  | <i>Ptpn2</i>   |
| 1438562_a_at | 0.5  | <i>Ptpn2</i>   |
| 1427486_at   | -0.9 | <i>Ptprb</i>   |
| 1436367_at   | -0.8 | <i>Ptprb</i>   |
| 1429052_at   | -0.4 | <i>Ptprd</i>   |
| 1435537_at   | -0.4 | <i>Ptprd</i>   |
| 1418539_a_at | 0.6  | <i>Ptpre</i>   |
| 1420843_at   | 0.4  | <i>Ptprf</i>   |
| 1420842_at   | 0.5  | <i>Ptprf</i>   |
| 1426794_at   | -0.4 | <i>Ptprs</i>   |
| 1420628_at   | -0.4 | <i>Pura</i>    |
| 1424970_at   | -0.4 | <i>Purg</i>    |
| 1423905_at   | 0.2  | <i>Pvr</i>     |
| 1417703_at   | 0.3  | <i>Pvrl2</i>   |
| 1417873_at   | 0.3  | <i>Pwp1</i>    |
| 1456135_s_at | 0.2  | <i>Pxn</i>     |
| 1417741_at   | 0.6  | <i>Pygl</i>    |
| 1426622_a_at | -0.4 | <i>Qpct</i>    |
| 1419243_at   | -0.4 | <i>Rab14</i>   |
| 1429123_at   | -1.5 | <i>Rab27a</i>  |
| 1452668_x_at | -0.5 | <i>Rab2b</i>   |
| 1431691_a_at | -0.7 | <i>Rab31</i>   |
| 1416165_at   | -0.4 | <i>Rab31</i>   |
| 1427773_a_at | -0.5 | <i>Rabac1</i>  |
| 1419068_at   | -0.5 | <i>Rabgef1</i> |
| 1421546_a_at | 1    | <i>Racgap1</i> |
| 1450903_at   | 0.3  | <i>Rad23b</i>  |
| 1418281_at   | 0.4  | <i>Rad51</i>   |
| 1431411_a_at | 0.3  | <i>Rai12</i>   |
| 1422547_at   | 0.4  | <i>Ranbp1</i>  |

|              |      |                |
|--------------|------|----------------|
| 1452833_at   | -0.4 | <i>Rapgef2</i> |
| 1434302_at   | -0.7 | <i>Raph1</i>   |
| 1416312_at   | 0.3  | <i>Rars</i>    |
| 1438030_at   | -1.1 | <i>Rasgrp3</i> |
| 1449292_at   | -1.2 | <i>Rblcc1</i>  |
| 1415775_at   | 0.2  | <i>Rbbp7</i>   |
| 1416174_at   | -0.7 | <i>Rbbp9</i>   |
| 1436979_x_at | 0.4  | <i>Rbm14</i>   |
| 1437862_at   | -1.2 | <i>Rbm25</i>   |
| 1436595_at   | 0.3  | <i>Rbm34</i>   |
| 1442744_at   | -1.3 | <i>Rbm39</i>   |
| 1446148_x_at | -0.8 | <i>Rbm39</i>   |
| 1438420_at   | -0.6 | <i>Rbm39</i>   |
| 1442745_x_at | -0.6 | <i>Rbm39</i>   |
| 1438069_a_at | -1.5 | <i>Rbm5</i>    |
| 1440223_at   | -0.6 | <i>Rbm6</i>    |
| 1418119_at   | 0.3  | <i>Rbm8a</i>   |
| 1418245_a_at | -0.7 | <i>Rbm9</i>    |
| 1434005_at   | 0.3  | <i>Rbms1</i>   |
| 1426225_at   | 1.7  | <i>Rbp4</i>    |
| 1438268_at   | -0.9 | <i>Rc3h2</i>   |
| 1417090_at   | 0.4  | <i>Rcn1</i>    |
| 1460632_at   | 0.4  | <i>Rdh10</i>   |
| 1418760_at   | -0.9 | <i>Rdh11</i>   |
| 1449209_a_at | -0.5 | <i>Rdh11</i>   |
| 1427963_s_at | -2.2 | <i>Rdh9</i>    |
| 1424778_at   | -0.9 | <i>Reep3</i>   |
| 1419398_a_at | -0.5 | <i>Reep5</i>   |
| 1448975_s_at | 1.3  | <i>Ren1</i>    |
| 1450107_a_at | -0.3 | <i>Renbp</i>   |
| 1451236_at   | -0.6 | <i>Rerg</i>    |
| 1449182_at   | 3.1  | <i>Retn</i>    |
| 1424715_at   | -1   | <i>Retsat</i>  |
| 1418342_at   | 0.5  | <i>Rfc1</i>    |
| 1417503_at   | 0.2  | <i>Rfc2</i>    |
| 1424321_at   | 0.9  | <i>Rfc4</i>    |
| 1416229_at   | -0.6 | <i>Rfk</i>     |
| 1416882_at   | -1   | <i>Rgs10</i>   |
| 1419247_at   | 0.3  | <i>Rgs2</i>    |
| 1419248_at   | 0.3  | <i>Rgs2</i>    |
| 1447830_s_at | 0.4  | <i>Rgs2</i>    |
| 1449516_a_at | -0.9 | <i>Rgs3</i>    |
| 1420941_at   | -2   | <i>Rgs5</i>    |
| 1417466_at   | -1.3 | <i>Rgs5</i>    |
| 1420942_s_at | -1.3 | <i>Rgs5</i>    |
| 1420940_x_at | -1.1 | <i>Rgs5</i>    |
| 1449110_at   | 0.2  | <i>Rhob</i>    |

|                            |      |                 |
|----------------------------|------|-----------------|
| 1435394_s_at               | 0.3  | <i>Rhoc</i>     |
| 1419061_at                 | -1.7 | <i>Rhod</i>     |
| 1449027_at                 | 0.1  | <i>Rhou</i>     |
| 1437179_at                 | -0.8 | <i>Rif1</i>     |
| AFFX-18SRNAMur/X00686_3_at | -0.6 | <i>Rn18s</i>    |
| 1422603_at                 | 0.2  | <i>Rnase4</i>   |
| 1452725_a_at               | 0.5  | <i>Rnaseh2a</i> |
| 1452734_at                 | 0.2  | <i>Rnaset2a</i> |
| 1416700_at                 | 0.3  | <i>Rnd3</i>     |
| 1426405_at                 | -0.8 | <i>Rnf11</i>    |
| 1452058_a_at               | -0.5 | <i>Rnf11</i>    |
| 1426404_a_at               | -0.4 | <i>Rnf11</i>    |
| 1418318_at                 | 0.2  | <i>Rnf128</i>   |
| 1449036_at                 | 0.2  | <i>Rnf128</i>   |
| 1451074_at                 | -0.5 | <i>Rnf13</i>    |
| 1438404_at                 | -0.6 | <i>Rnf144a</i>  |
| 1423729_a_at               | -0.5 | <i>Rnf181</i>   |
| 1417508_at                 | 0.5  | <i>Rnf19a</i>   |
| 1455500_at                 | 0.2  | <i>Rnf213</i>   |
| 1453106_a_at               | 0.4  | <i>Rnmt</i>     |
| 1429504_at                 | -0.6 | <i>Rnpc3</i>    |
| 1437027_x_at               | 0.3  | <i>Rnps1</i>    |
| 1423445_at                 | -0.4 | <i>Rock1</i>    |
| 1436326_at                 | -1.3 | <i>Rora</i>     |
| 1420583_a_at               | -1.1 | <i>Rora</i>     |
| 1458129_at                 | -1   | <i>Rora</i>     |
| 1436325_at                 | -0.9 | <i>Rora</i>     |
| 1424034_at                 | -0.7 | <i>Rora</i>     |
| 1455165_at                 | -0.5 | <i>Rora</i>     |
| 1434061_at                 | -0.9 | <i>Rp2h</i>     |
| 1419585_at                 | -0.8 | <i>Rp2h</i>     |
| 1437309_a_at               | 0.3  | <i>Rpa1</i>     |
| 1454627_a_at               | 0.2  | <i>Rpl29</i>    |
| 1416519_at                 | 0.1  | <i>Rpl36</i>    |
| 1459657_s_at               | 0.4  | <i>Rpo1-3</i>   |
| 1455174_at                 | 0.5  | <i>Rps19bp1</i> |
| 1448245_at                 | 0.1  | <i>Rpsa</i>     |
| 1448689_at                 | 0.3  | <i>Rras2</i>    |
| 1417398_at                 | 0.7  | <i>Rras2</i>    |
| 1452767_at                 | 0.5  | <i>Rrbp1</i>    |
| 1448226_at                 | 0.2  | <i>Rrm2</i>     |
| 1434437_x_at               | 0.4  | <i>Rrm2</i>     |
| 1427720_a_at               | 0.3  | <i>Rrp1</i>     |
| 1417096_at                 | 0.6  | <i>Rrp15</i>    |
| 1456117_at                 | 0.5  | <i>Rrp1b</i>    |
| 1416998_at                 | 0.3  | <i>Rrs1</i>     |
| 1459981_s_at               | 0.3  | <i>Rsbn1</i>    |

|              |      |                |
|--------------|------|----------------|
| 1435536_at   | -0.4 | <i>Rsc1a1</i>  |
| 1438735_at   | -0.8 | <i>Rsf1</i>    |
| 1432579_at   | 0.8  | <i>Rshl2a</i>  |
| 1424134_at   | -0.7 | <i>Rspry1</i>  |
| 1424135_at   | -0.5 | <i>Rspry1</i>  |
| 1442083_at   | -0.6 | <i>Rsrc2</i>   |
| 1421116_a_at | -0.7 | <i>Rtn4</i>    |
| 1435284_at   | -0.5 | <i>Rtn4</i>    |
| 1418580_at   | 0.8  | <i>Rtp4</i>    |
| 1424402_at   | -1.4 | <i>Rufy3</i>   |
| 1424704_at   | -0.3 | <i>Runx2</i>   |
| 1427913_at   | 0.3  | <i>Rwdd1</i>   |
| 1456642_x_at | 0.2  | <i>S100a10</i> |
| 1416762_at   | 0.4  | <i>S100a10</i> |
| 1460351_at   | 0.3  | <i>S100a11</i> |
| 1424542_at   | -2   | <i>S100a4</i>  |
| 1421375_a_at | -0.8 | <i>S100a6</i>  |
| 1419394_s_at | 1.8  | <i>S100a8</i>  |
| 1418595_at   | -1.5 | <i>S3-12</i>   |
| 1450826_a_at | -1.6 | <i>Saa3</i>    |
| 1460603_at   | -0.8 | <i>Samd9l</i>  |
| 1415718_at   | -0.4 | <i>Sap30l</i>  |
| 1454030_at   | -1.4 | <i>Saps3</i>   |
| 1423720_a_at | 0.4  | <i>Sar1a</i>   |
| 1452000_s_at | 0.3  | <i>Sars</i>    |
| 1448005_at   | -0.6 | <i>Sash1</i>   |
| 1423978_at   | -1.1 | <i>Sbk1</i>    |
| 1451190_a_at | -1   | <i>Sbk1</i>    |
| 1455026_at   | -0.9 | <i>Sbno1</i>   |
| 1424709_at   | -1.4 | <i>Sc5d</i>    |
| 1434520_at   | -0.9 | <i>Sc5d</i>    |
| 1451457_at   | -0.6 | <i>Sc5d</i>    |
| 1453054_at   | -1.3 | <i>Scamp1</i>  |
| 1433520_at   | -0.3 | <i>Scap</i>    |
| 1451204_at   | 1    | <i>Scara5</i>  |
| 1416050_a_at | -0.4 | <i>Scarb1</i>  |
| 1437378_x_at | -0.3 | <i>Scarb1</i>  |
| 1454704_at   | 0.4  | <i>Scarb2</i>  |
| 1460235_at   | 0.4  | <i>Scarb2</i>  |
| 1415964_at   | 0.7  | <i>Scd1</i>    |
| 1415965_at   | 0.8  | <i>Scd1</i>    |
| 1416267_at   | -0.9 | <i>Scoc</i>    |
| 1416486_at   | 0.4  | <i>Scye1</i>   |
| 1416241_at   | 0.3  | <i>Sec13</i>   |
| 1433627_at   | 0.3  | <i>Sec23ip</i> |
| 1416189_a_at | 0.2  | <i>Sec61a1</i> |
| 1448242_at   | 0.2  | <i>Sec61a1</i> |

|              |      |                  |
|--------------|------|------------------|
| 1423090_x_at | 0.2  | <i>Sec61g</i>    |
| 1444811_at   | -1.2 | <i>Sec62</i>     |
| 1455698_at   | -0.7 | <i>Sec62</i>     |
| 1454697_at   | -0.6 | <i>Sec62</i>     |
| 1433704_s_at | -0.5 | <i>Sec62</i>     |
| 1424394_at   | -0.6 | <i>Selm</i>      |
| 1429459_at   | -2.7 | <i>Sema3d</i>    |
| 1437422_at   | -0.7 | <i>Sema5a</i>    |
| 1453055_at   | -0.6 | <i>Sema6d</i>    |
| 1438413_at   | -0.6 | <i>Senp7</i>     |
| 1454084_a_at | -0.7 | <i>Senp8</i>     |
| 1455422_x_at | -1.1 | <i>4-Sep</i>     |
| 1448729_a_at | -0.6 | <i>4-Sep</i>     |
| 1437995_x_at | -0.3 | <i>7-Sep</i>     |
| 1460561_x_at | 0.4  | <i>Sepw1</i>     |
| 1418564_s_at | 0.2  | <i>Serbp1</i>    |
| 1437280_s_at | 0.2  | <i>Serbp1</i>    |
| 1433723_s_at | -0.4 | <i>Serf2</i>     |
| 1437513_a_at | -0.8 | <i>Serinc1</i>   |
| 1454811_a_at | -0.5 | <i>Serinc1</i>   |
| 1415838_at   | -0.4 | <i>Serinc1</i>   |
| 1456080_a_at | -0.8 | <i>Serinc3</i>   |
| 1434548_at   | -0.4 | <i>Serinc3</i>   |
| 1433571_at   | -0.6 | <i>Serinc5</i>   |
| 1424923_at   | 1.1  | <i>Serpina3g</i> |
| 1419100_at   | 1.4  | <i>Serpina3n</i> |
| 1416318_at   | 0.3  | <i>Serpinb1a</i> |
| 1448301_s_at | 0.6  | <i>Serpinb1a</i> |
| 1419082_at   | -1   | <i>Serpinb2</i>  |
| 1422601_at   | 0.5  | <i>Serpinb9</i>  |
| 1416666_at   | 0.2  | <i>Serpine2</i>  |
| 1416625_at   | 0.7  | <i>Serping1</i>  |
| 1454699_at   | -0.7 | <i>Sesn1</i>     |
| 1438931_s_at | -0.6 | <i>Sesn1</i>     |
| 1453313_at   | -1.3 | <i>Sesn3</i>     |
| 1449303_at   | -0.9 | <i>Sesn3</i>     |
| 1437353_at   | -0.4 | <i>Setd1b</i>    |
| 1436898_at   | -1.1 | <i>Sfpq</i>      |
| 1448201_at   | 1.2  | <i>Sfrp2</i>     |
| 1451031_at   | -0.8 | <i>Sfrp4</i>     |
| 1427136_s_at | -1   | <i>Sfrs12</i>    |
| 1435080_x_at | -0.7 | <i>Sfrs18</i>    |
| 1429538_a_at | -0.6 | <i>Sfrs18</i>    |
| 1437041_at   | -0.5 | <i>Sfrs18</i>    |
| 1452439_s_at | 0.2  | <i>Sfrs2</i>     |
| 1427504_s_at | 0.3  | <i>Sfrs2</i>     |
| 1452885_at   | -0.5 | <i>Sfrs2ip</i>   |



|              |      |                 |
|--------------|------|-----------------|
| 1416721_s_at | 0.3  | <i>Sfrs6</i>    |
| 1424033_at   | -0.5 | <i>Sfrs7</i>    |
| 1435141_at   | -0.8 | <i>Sft2d2</i>   |
| 1417560_at   | 0.2  | <i>Sfxn1</i>    |
| 1417559_at   | 0.5  | <i>Sfxn1</i>    |
| 1443219_at   | -1.2 | <i>Sgcd</i>     |
| 1416041_at   | -0.6 | <i>Sgk1</i>     |
| 1426575_at   | -0.4 | <i>Sgms1</i>    |
| 1416299_at   | 1.1  | <i>Shcgp1</i>   |
| 1452214_at   | -0.8 | <i>Skil</i>     |
| 1417622_at   | 0.4  | <i>Slc12a2</i>  |
| 1415802_at   | 0.5  | <i>Slc16a1</i>  |
| 1418446_at   | -0.6 | <i>Slc16a2</i>  |
| 1429726_at   | -1   | <i>Slc16a9</i>  |
| 1429727_at   | -0.6 | <i>Slc16a9</i>  |
| 1416629_at   | 0.5  | <i>Slc1a5</i>   |
| 1450395_at   | 0.4  | <i>Slc22a5</i>  |
| 1416954_at   | 0.3  | <i>Slc25a10</i> |
| 1434996_at   | -0.5 | <i>Slc25a16</i> |
| 1424776_a_at | 0.4  | <i>Slc25a28</i> |
| 1450018_s_at | 0.2  | <i>Slc25a30</i> |
| 1423772_x_at | 0.2  | <i>Slc25a5</i>  |
| 1430542_a_at | 0.2  | <i>Slc25a5</i>  |
| 1434801_x_at | 0.2  | <i>Slc25a5</i>  |
| 1436874_x_at | 0.2  | <i>Slc25a5</i>  |
| 1434773_a_at | 0.5  | <i>Slc2a1</i>   |
| 1426599_a_at | 0.7  | <i>Slc2a1</i>   |
| 1436164_at   | -0.8 | <i>Slc30a1</i>  |
| 1416854_at   | 0.6  | <i>Slc34a2</i>  |
| 1423457_at   | -1   | <i>Slc35a5</i>  |
| 1419971_s_at | -0.6 | <i>Slc35a5</i>  |
| 1445629_at   | -0.9 | <i>Slc35d1</i>  |
| 1428805_at   | -0.7 | <i>Slc35e3</i>  |
| 1452492_a_at | -0.8 | <i>Slc37a2</i>  |
| 1457266_at   | -1.3 | <i>Slc38a6</i>  |
| 1427035_at   | 0.4  | <i>Slc39a14</i> |
| 1424674_at   | 0.3  | <i>Slc39a6</i>  |
| 1425364_a_at | 0.6  | <i>Slc3a2</i>   |
| 1417061_at   | -0.7 | <i>Slc40a1</i>  |
| 1448566_at   | -0.6 | <i>Slc40a1</i>  |
| 1452445_at   | 0.6  | <i>Slc41a2</i>  |
| 1422788_at   | 0.5  | <i>Slc43a3</i>  |
| 1426663_s_at | 0.5  | <i>Slc45a3</i>  |
| 1457528_at   | -0.8 | <i>Slc4a7</i>   |
| 1454991_at   | 0.6  | <i>Slc7a1</i>   |
| 1443536_at   | 0.4  | <i>Slc7a11</i>  |
| 1418326_at   | 0.4  | <i>Slc7a5</i>   |

|              |      |                 |
|--------------|------|-----------------|
| 1417929_at   | 0.4  | <i>Slc7a8</i>   |
| 1438115_a_at | 0.5  | <i>Slc9a3r1</i> |
| 1438116_x_at | 0.5  | <i>Slc9a3r1</i> |
| 1444242_at   | 0.3  | <i>Slco2a1</i>  |
| 1420913_at   | 0.6  | <i>Slco2a1</i>  |
| 1433933_s_at | 1    | <i>Slco2b1</i>  |
| 1424659_at   | -0.5 | <i>Slit2</i>    |
| 1452296_at   | 0.8  | <i>Slit3</i>    |
| 1416081_at   | -0.5 | <i>Smad1</i>    |
| 1448208_at   | -0.5 | <i>Smad1</i>    |
| 1422771_at   | -0.8 | <i>Smad6</i>    |
| 1460292_a_at | 0.3  | <i>Smarca1</i>  |
| 1430526_a_at | -0.5 | <i>Smarca2</i>  |
| 1428251_at   | 0.3  | <i>Smchd1</i>   |
| 1448321_at   | -0.5 | <i>Smoc1</i>    |
| 1416999_at   | -0.8 | <i>Smpd2</i>    |
| 1417300_at   | -0.6 | <i>Smpd13b</i>  |
| 1451722_s_at | 0.4  | <i>Smyd5</i>    |
| 1447643_x_at | 0.6  | <i>Snai2</i>    |
| 1416688_at   | -2   | <i>Snap91</i>   |
| 1436703_x_at | 0.3  | <i>Snape2</i>   |
| 1415756_a_at | -0.4 | <i>Snarin</i>   |
| 1433674_a_at | 0.2  | <i>Snhg1</i>    |
| 1433675_at   | 0.3  | <i>Snhg1</i>    |
| 1425678_a_at | -0.7 | <i>Snrk</i>     |
| 1448864_at   | -0.5 | <i>Snrk</i>     |
| 1417274_at   | 0.2  | <i>Snrpa</i>    |
| 1417351_a_at | 0.5  | <i>Snrpa1</i>   |
| 1417352_s_at | 0.5  | <i>Snrpa1</i>   |
| 1437193_s_at | 0.2  | <i>Snrpb</i>    |
| 1419260_a_at | 0.4  | <i>Snrpb</i>    |
| 1416336_s_at | 0.5  | <i>Snrpd1</i>   |
| 1422884_at   | 0.3  | <i>Snrpd3</i>   |
| 1451294_s_at | 0.2  | <i>Snrpe</i>    |
| 1428672_at   | 0.3  | <i>Snrpf</i>    |
| 1431055_a_at | 0.3  | <i>Snx10</i>    |
| 1435251_at   | -0.8 | <i>Snx13</i>    |
| 1456039_at   | -0.5 | <i>Snx14</i>    |
| 1456041_at   | -1.1 | <i>Snx16</i>    |
| 1416360_at   | -1.3 | <i>Snx18</i>    |
| 1423077_at   | -0.8 | <i>Snx9</i>     |
| 1423076_at   | -0.4 | <i>Snx9</i>     |
| 1434362_at   | 0.3  | <i>Soat1</i>    |
| 1418507_s_at | -0.3 | <i>Socs2</i>    |
| 1416576_at   | 0.6  | <i>Socs3</i>    |
| 1456212_x_at | 0.6  | <i>Socs3</i>    |
| 1455899_x_at | 0.8  | <i>Socs3</i>    |

|              |      |                   |
|--------------|------|-------------------|
| 1440222_at   | -1.3 | <i>Sod1</i>       |
| 1438871_at   | -0.8 | <i>Son</i>        |
| 1425826_a_at | -1.3 | <i>Sorbs1</i>     |
| 1428471_at   | -1.1 | <i>Sorbs1</i>     |
| 1436737_a_at | -1.1 | <i>Sorbs1</i>     |
| 1437197_at   | -0.6 | <i>Sorbs2</i>     |
| 1434389_at   | -0.6 | <i>Sos1</i>       |
| 1419157_at   | -0.9 | <i>Sox4</i>       |
| 1419156_at   | -0.4 | <i>Sox4</i>       |
| 1433575_at   | -0.3 | <i>Sox4</i>       |
| 1419588_at   | -1.5 | <i>Spag1</i>      |
| 1423215_at   | 0.2  | <i>Spcs2</i>      |
| 1453391_at   | -0.7 | <i>Speer7-ps1</i> |
| 1451596_a_at | 1.2  | <i>Sphk1</i>      |
| 1451342_at   | 0.9  | <i>Spon1</i>      |
| 1452911_at   | 0.5  | <i>Spred1</i>     |
| 1436584_at   | 0.3  | <i>Spry2</i>      |
| 1460243_at   | 0.5  | <i>Sptlc2</i>     |
| 1417426_at   | 0.9  | <i>Srgn</i>       |
| 1421260_a_at | 0.6  | <i>Srm</i>        |
| 1433708_at   | 0.3  | <i>Srp68</i>      |
| 1417135_at   | -1.1 | <i>Srpk2</i>      |
| 1417136_s_at | -0.7 | <i>Srpk2</i>      |
| 1437638_at   | -1.1 | <i>Srrm2</i>      |
| 1438688_at   | -0.5 | <i>Srrm2</i>      |
| 1416422_a_at | 0.3  | <i>Ssb</i>        |
| 1426790_at   | 0.2  | <i>Ssrp1</i>      |
| 1426789_s_at | 0.3  | <i>Ssrp1</i>      |
| 1426788_a_at | 0.4  | <i>Ssrp1</i>      |
| 1421892_at   | -1.3 | <i>St3gal2</i>    |
| 1420928_at   | 0.3  | <i>St6gal1</i>    |
| 1427072_at   | -0.6 | <i>Stard8</i>     |
| 1420915_at   | 1.2  | <i>Stat1</i>      |
| 1450034_at   | 1.3  | <i>Stat1</i>      |
| 1450033_a_at | 1.9  | <i>Stat1</i>      |
| 1460700_at   | 0.5  | <i>Stat3</i>      |
| 1421469_a_at | 0.5  | <i>Stat5a</i>     |
| 1422103_a_at | -0.6 | <i>Stat5b</i>     |
| 1450448_at   | -0.9 | <i>Stc1</i>       |
| 1424938_at   | 1.3  | <i>Steap1</i>     |
| 1428636_at   | 0.7  | <i>Steap2</i>     |
| 1415849_s_at | 0.3  | <i>Stmn1</i>      |
| 1419097_a_at | 0.6  | <i>Stom</i>       |
| 1447624_s_at | -0.7 | <i>Stox2</i>      |
| 1416566_at   | 0.2  | <i>Strap</i>      |
| 1426411_a_at | -0.7 | <i>Strbp</i>      |
| 1452061_s_at | -0.6 | <i>Strbp</i>      |

|              |      |                |
|--------------|------|----------------|
| 1435982_at   | -0.6 | <i>Stx12</i>   |
| 1429237_at   | -0.9 | <i>Stx16</i>   |
| 1437390_x_at | -1   | <i>Stx1a</i>   |
| 1448366_at   | -1   | <i>Stx1a</i>   |
| 1435398_at   | -0.9 | <i>Stxbp5</i>  |
| 1435396_at   | -0.4 | <i>Stxbp6</i>  |
| 1427345_a_at | 1    | <i>Sult1a1</i> |
| 1422457_s_at | 0.4  | <i>Sumo3</i>   |
| 1419741_at   | 0.4  | <i>Supt16h</i> |
| 1441906_x_at | -0.5 | <i>Syap1</i>   |
| 1449534_at   | 0.7  | <i>Sycp3</i>   |
| 1422768_at   | 0.5  | <i>Syncrip</i> |
| 1434089_at   | 0.4  | <i>Synpo</i>   |
| 1422878_at   | 1.5  | <i>Syt12</i>   |
| 1460595_at   | -1.5 | <i>Syt14</i>   |
| 1421594_a_at | -0.8 | <i>Syt2</i>    |
| 1443609_s_at | -0.7 | <i>Syvn1</i>   |
| 1440187_at   | -1.2 | <i>Taf3</i>    |
| 1426529_a_at | 0.4  | <i>Tagln2</i>  |
| 1439407_x_at | 0.5  | <i>Tagln2</i>  |
| 1452714_at   | -0.4 | <i>Tanc1</i>   |
| 1426358_at   | -0.6 | <i>Taok1</i>   |
| 1416016_at   | 1.8  | <i>Tap1</i>    |
| 1453913_a_at | 0.8  | <i>Tap2</i>    |
| 1421812_at   | 1    | <i>Tapbp</i>   |
| 1460323_at   | 0.3  | <i>Tars</i>    |
| 1420196_s_at | -0.5 | <i>Tbc1d14</i> |
| 1416996_at   | -1.1 | <i>Tbc1d8</i>  |
| 1436752_at   | -0.8 | <i>Tbccd1</i>  |
| 1452648_at   | 0.4  | <i>Tbrg1</i>   |
| 1442793_s_at | 0.7  | <i>Tbrg4</i>   |
| 1421033_a_at | 0.6  | <i>Tcerg1</i>  |
| 1437205_at   | -0.5 | <i>Tcf25</i>   |
| 1434148_at   | -0.4 | <i>Tcf4</i>    |
| 1448200_at   | -0.5 | <i>Tcn2</i>    |
| 1448122_at   | 0.4  | <i>Tcp1</i>    |
| 1454646_at   | -0.5 | <i>Tcp1112</i> |
| 1435715_x_at | 0.3  | <i>Tdg</i>     |
| 1416790_a_at | 0.5  | <i>Tdg</i>     |
| 1418788_at   | -0.8 | <i>Tek</i>     |
| 1452661_at   | 0.3  | <i>Tjfc</i>    |
| 1421943_at   | -0.5 | <i>Tgfa</i>    |
| 1420895_at   | 0.4  | <i>Tgfbr1</i>  |
| 1433795_at   | 0.5  | <i>Tgfbr3</i>  |
| 1426004_a_at | 0.5  | <i>Tgm2</i>    |
| 1417500_a_at | 0.6  | <i>Tgm2</i>    |
| 1433428_x_at | 0.6  | <i>Tgm2</i>    |

|              |      |                 |
|--------------|------|-----------------|
| 1437277_x_at | 0.6  | <i>Tgm2</i>     |
| 1455900_x_at | 0.7  | <i>Tgm2</i>     |
| 1423308_at   | -0.7 | <i>Tgoln1</i>   |
| 1449009_at   | 3    | <i>Tgtp</i>     |
| 1416198_at   | 0.4  | <i>Th1l</i>     |
| 1448529_at   | 0.4  | <i>Thbd</i>     |
| 1460302_at   | 0.3  | <i>Thbs1</i>    |
| 1438736_at   | -0.7 | <i>Thoc2</i>    |
| 1444004_at   | -0.5 | <i>Thoc2</i>    |
| 1417724_at   | 0.5  | <i>Thoc4</i>    |
| 1422973_a_at | 1.4  | <i>Thrsp</i>    |
| 1424737_at   | 2.4  | <i>Thrsp</i>    |
| 1423135_at   | 0.5  | <i>Thy1</i>     |
| 1416485_at   | 0.3  | <i>Timm23</i>   |
| 1448801_a_at | 0.1  | <i>Timm44</i>   |
| 1416345_at   | 0.5  | <i>Timm8a1</i>  |
| 1420924_at   | -1.3 | <i>Timp2</i>    |
| 1433662_s_at | -0.5 | <i>Timp2</i>    |
| 1423405_at   | 1.8  | <i>Timp4</i>    |
| 1452161_at   | -0.7 | <i>Tiparp</i>   |
| 1452160_at   | -0.6 | <i>Tiparp</i>   |
| 1426612_at   | 0.7  | <i>Tipin</i>    |
| 1417749_a_at | -0.5 | <i>Tjp1</i>     |
| 1426616_at   | -1.6 | <i>Tlcd1</i>    |
| 1452132_at   | -1   | <i>Tlcd1</i>    |
| 1436244_a_at | -1.3 | <i>Tle2</i>     |
| 1448402_at   | 0.3  | <i>Tln1</i>     |
| 1450958_at   | 0.3  | <i>Tm4sf1</i>   |
| 1460684_at   | -0.9 | <i>Tm7sf2</i>   |
| 1423295_at   | -0.5 | <i>Tm9sf2</i>   |
| 1428050_a_at | -0.4 | <i>Tmbim4</i>   |
| 1424708_at   | 0.2  | <i>Tmed10</i>   |
| 1424574_at   | 0.3  | <i>Tmed5</i>    |
| 1448268_at   | 0.3  | <i>Tmed9</i>    |
| 1454669_at   | 0.5  | <i>Tmem11</i>   |
| 1451344_at   | 1.6  | <i>Tmem119</i>  |
| 1452074_at   | -1.2 | <i>Tmem135</i>  |
| 1426435_at   | -0.8 | <i>Tmem135</i>  |
| 1419170_at   | -0.6 | <i>Tmem157</i>  |
| 1426211_at   | -0.6 | <i>Tmem161a</i> |
| 1459713_s_at | -0.4 | <i>Tmem16a</i>  |
| 1429175_at   | -1.9 | <i>Tmem178</i>  |
| 1436963_x_at | -0.7 | <i>Tmem179b</i> |
| 1449842_at   | -0.6 | <i>Tmem179b</i> |
| 1438561_x_at | -1   | <i>Tmem180</i>  |
| 1420191_s_at | -0.9 | <i>Tmem191c</i> |
| 1435452_at   | -1.6 | <i>Tmem20</i>   |

|              |      |                 |
|--------------|------|-----------------|
| 1434621_at   | -1.2 | <i>Tmem204</i>  |
| 1436698_x_at | -1.1 | <i>Tmem204</i>  |
| 1447915_x_at | -1.1 | <i>Tmem204</i>  |
| 1448552_s_at | -0.6 | <i>Tmem206</i>  |
| 1416447_at   | -0.7 | <i>Tmem30a</i>  |
| 1433579_at   | 0.4  | <i>Tmem30b</i>  |
| 1431105_a_at | -1   | <i>Tmem33</i>   |
| 1425568_a_at | -0.4 | <i>Tmem33</i>   |
| 1460122_at   | -0.9 | <i>Tmem41b</i>  |
| 1422587_at   | 1.3  | <i>Tmem45a</i>  |
| 1423722_at   | 0.3  | <i>Tmem49</i>   |
| 1424042_at   | 0.3  | <i>Tmem5</i>    |
| 1424383_at   | -0.6 | <i>Tmem51</i>   |
| 1434553_at   | -3.5 | <i>Tmem56</i>   |
| 1430418_at   | -1.3 | <i>Tmem57</i>   |
| 1455350_at   | -0.8 | <i>Tmem62</i>   |
| 1433735_a_at | -0.6 | <i>Tmem64</i>   |
| 1454709_at   | -0.6 | <i>Tmem64</i>   |
| 1436212_at   | -0.4 | <i>Tmem71</i>   |
| 1424782_at   | -0.4 | <i>Tmem77</i>   |
| 1431726_a_at | -0.7 | <i>Tmem80</i>   |
| 1420726_x_at | -0.5 | <i>Tmlhe</i>    |
| 1423089_at   | -0.6 | <i>Tmod3</i>    |
| 1438556_a_at | -0.5 | <i>Tmod3</i>    |
| 1415906_at   | 0.4  | <i>Tmsb4x</i>   |
| 1416342_at   | -0.5 | <i>Tnc</i>      |
| 1438855_x_at | 0.7  | <i>Tnfaip2</i>  |
| 1418424_at   | 0.8  | <i>Tnfaip6</i>  |
| 1448147_at   | -0.5 | <i>Tnfrsf19</i> |
| 1417291_at   | 0.4  | <i>Tnfrsf1a</i> |
| 1460469_at   | -3.1 | <i>Tnfrsf9</i>  |
| 1455256_at   | -0.8 | <i>Tnik</i>     |
| 1433585_at   | -0.4 | <i>Tnpo1</i>    |
| 1419283_s_at | -0.5 | <i>Tns1</i>     |
| 1455333_at   | -0.7 | <i>Tns3</i>     |
| 1426676_s_at | 0.2  | <i>Tomm70a</i>  |
| 1417192_at   | 0.6  | <i>Tomm70a</i>  |
| 1454694_a_at | 0.6  | <i>Top2a</i>    |
| 1417820_at   | -0.5 | <i>Tor1b</i>    |
| 1452927_x_at | 0.2  | <i>Tpi1</i>     |
| 1415918_a_at | 0.3  | <i>Tpi1</i>     |
| 1425388_a_at | -1.6 | <i>Tpk1</i>     |
| 1423721_at   | 0.3  | <i>Tpm1</i>     |
| 1419738_a_at | 0.4  | <i>Tpm2</i>     |
| 1425028_a_at | 0.4  | <i>Tpm2</i>     |
| 1449577_x_at | 0.5  | <i>Tpm2</i>     |
| 1433883_at   | 0.1  | <i>Tpm4</i>     |

|              |      |                  |
|--------------|------|------------------|
| 1416086_at   | -0.5 | <i>Tpst2</i>     |
| 1442886_at   | -1.3 | <i>Tra2a</i>     |
| 1454725_at   | -0.6 | <i>Tra2a</i>     |
| 1448508_at   | 0.4  | <i>Traf3ip2</i>  |
| 1419749_at   | 0.5  | <i>Trdmt1</i>    |
| 1425546_a_at | 0.8  | <i>Trf</i>       |
| 1426640_s_at | 0.4  | <i>Trib2</i>     |
| 1417027_at   | -0.9 | <i>Trim2</i>     |
| 1459860_x_at | -0.9 | <i>Trim2</i>     |
| 1417028_a_at | -0.8 | <i>Trim2</i>     |
| 1448551_a_at | -0.8 | <i>Trim2</i>     |
| 1415869_a_at | 0.5  | <i>Trim28</i>    |
| 1424857_a_at | -0.8 | <i>Trim34</i>    |
| 1449041_a_at | 0.4  | <i>Trip6</i>     |
| 1436533_at   | -1.2 | <i>Trove2</i>    |
| 1423433_at   | -1.1 | <i>Trove2</i>    |
| 1436535_at   | -0.8 | <i>Trove2</i>    |
| 1416926_at   | -0.6 | <i>Trp53inp1</i> |
| 1452646_at   | -0.6 | <i>Trp53inp2</i> |
| 1430485_at   | -1.7 | <i>Trpc2</i>     |
| 1438877_at   | -1.9 | <i>Trpm6</i>     |
| 1428747_at   | 0.3  | <i>Trspap1</i>   |
| 1448276_at   | 0.3  | <i>Tspan4</i>    |
| 1424649_a_at | 0.8  | <i>Tspan8</i>    |
| 1433502_s_at | 0.5  | <i>Tsr1</i>      |
| 1455643_s_at | 0.5  | <i>Tsr1</i>      |
| 1426544_a_at | -1.5 | <i>Ttc14</i>     |
| 1437878_s_at | -0.9 | <i>Ttc14</i>     |
| 1452665_at   | 0.6  | <i>Ttc27</i>     |
| 1452890_at   | -0.7 | <i>Till5</i>     |
| 1427284_a_at | 0.8  | <i>Ttpa</i>      |
| 1423846_x_at | 0.2  | <i>Tuba1b</i>    |
| 1417373_a_at | 0.4  | <i>Tuba4a</i>    |
| 1423642_at   | 0.3  | <i>Tubb2c</i>    |
| 1416256_a_at | 0.2  | <i>Tubb5</i>     |
| 1455719_at   | 0.2  | <i>Tubb5</i>     |
| 1416119_at   | 0.2  | <i>Txn1</i>      |
| 1455640_a_at | 0.5  | <i>Txn2</i>      |
| 1437143_a_at | 0.2  | <i>Txndc1</i>    |
| 1453120_at   | -0.5 | <i>Txndc13</i>   |
| 1427050_at   | -0.6 | <i>Txndc16</i>   |
| 1423247_at   | 0.2  | <i>Txndc4</i>    |
| 1415997_at   | -1.2 | <i>Txnip</i>     |
| 1415996_at   | -1.1 | <i>Txnip</i>     |
| 1435235_at   | 0.3  | <i>Txn11</i>     |
| 1449097_at   | -0.6 | <i>Txnrd2</i>    |
| 1450792_at   | 0.5  | <i>Tyrobp</i>    |

|              |      |               |
|--------------|------|---------------|
| 1417609_at   | -0.4 | <i>Ube2a</i>  |
| 1439477_at   | -0.9 | <i>Ube2b</i>  |
| 1423106_at   | -0.4 | <i>Ube2b</i>  |
| 1424062_at   | -0.5 | <i>Ube2d1</i> |
| 1428791_at   | -0.6 | <i>Ube2h</i>  |
| 1438971_x_at | -0.6 | <i>Ube2h</i>  |
| 1417983_a_at | 0.4  | <i>Ube2v2</i> |
| 1426398_at   | -0.5 | <i>Ube2w</i>  |
| 1432499_a_at | -0.7 | <i>Ube4b</i>  |
| 1423461_a_at | -0.5 | <i>Ubl3</i>   |
| 1438401_at   | -0.6 | <i>Ubn1</i>   |
| 1429515_at   | -0.5 | <i>Ubr2</i>   |
| 1426485_at   | -0.8 | <i>Ubx2</i>   |
| 1426486_at   | -0.4 | <i>Ubx2</i>   |
| 1439740_s_at | 0.4  | <i>Uck2</i>   |
| 1448604_at   | 0.4  | <i>Uck2</i>   |
| 1426909_at   | 0.6  | <i>Uck2</i>   |
| 1459740_s_at | 0.3  | <i>Ucp2</i>   |
| 1455839_at   | 0.3  | <i>Ugcg11</i> |
| 1416308_at   | 0.2  | <i>Ugdh</i>   |
| 1433737_at   | -0.5 | <i>Uhm1</i>   |
| 1417846_at   | -0.7 | <i>Ulk2</i>   |
| 1448858_at   | -0.7 | <i>Ulk2</i>   |
| 1417847_at   | -0.6 | <i>Ulk2</i>   |
| 1428992_at   | -1.4 | <i>Unc13d</i> |
| 1435110_at   | -1.2 | <i>Unc5b</i>  |
| 1426667_a_at | -0.6 | <i>Unc84a</i> |
| 1435831_at   | 0.5  | <i>Upk1b</i>  |
| 1454881_s_at | 0.8  | <i>Upk3b</i>  |
| 1434237_at   | 0.9  | <i>Upk3b</i>  |
| 1451080_at   | 0.3  | <i>Usp1</i>   |
| 1417168_a_at | 1.3  | <i>Usp2</i>   |
| 1455237_at   | 0.5  | <i>Usp36</i>  |
| 1419277_at   | -0.6 | <i>Usp48</i>  |
| 1444507_at   | -1   | <i>Usp53</i>  |
| 1452385_at   | -0.8 | <i>Usp53</i>  |
| 1446807_at   | -0.9 | <i>Usp8</i>   |
| 1456245_x_at | 0.2  | <i>Vamp3</i>  |
| 1437708_x_at | 0.3  | <i>Vamp3</i>  |
| 1430522_a_at | -0.4 | <i>Vamp5</i>  |
| 1452007_at   | -0.8 | <i>Vamp7</i>  |
| 1426269_at   | -0.5 | <i>Vamp7</i>  |
| 1420624_a_at | -0.7 | <i>Vamp8</i>  |
| 1441097_at   | -0.7 | <i>Vangl1</i> |
| 1421694_a_at | 0.6  | <i>Vcan</i>   |
| 1427256_at   | 0.7  | <i>Vcan</i>   |
| 1427257_at   | 0.8  | <i>Vcan</i>   |



|              |      |               |
|--------------|------|---------------|
| 1416156_at   | 0.3  | <i>Vcl</i>    |
| 1456607_at   | -0.9 | <i>Vcpip1</i> |
| 1420909_at   | -1   | <i>Vegfa</i>  |
| 1439766_x_at | -1.3 | <i>Vegfc</i>  |
| 1440739_at   | -0.9 | <i>Vegfc</i>  |
| 1419417_at   | -0.6 | <i>Vegfc</i>  |
| 1430596_s_at | 0.4  | <i>Vgll3</i>  |
| 1453593_at   | 0.5  | <i>Vgll3</i>  |
| 1438258_at   | -1.2 | <i>Vldlr</i>  |
| 1418486_at   | -1.6 | <i>Vnn1</i>   |
| 1420495_a_at | 0.5  | <i>Vps26a</i> |
| 1429363_at   | -0.3 | <i>Vps37a</i> |
| 1437901_a_at | -0.7 | <i>Vps41</i>  |
| 1436671_at   | 2.1  | <i>Vsig8</i>  |
| 1451494_at   | -0.5 | <i>Wac</i>    |
| 1434813_x_at | 0.7  | <i>Wars</i>   |
| 1415694_at   | 1.2  | <i>Wars</i>   |
| 1426777_a_at | -1.1 | <i>Wasl</i>   |
| 1452193_a_at | -0.6 | <i>Wasl</i>   |
| 1449441_a_at | -0.9 | <i>Wbp1</i>   |
| 1423054_at   | 0.3  | <i>Wdr1</i>   |
| 1450851_at   | 0.3  | <i>Wdr1</i>   |
| 1460189_at   | -0.5 | <i>Wdr23</i>  |
| 1423963_at   | -1.1 | <i>Wdr26</i>  |
| 1454869_at   | -0.9 | <i>Wdr40b</i> |
| 1433621_at   | -2.5 | <i>Wdr41</i>  |
| 1433620_at   | -1.9 | <i>Wdr41</i>  |
| 1437828_s_at | 0.4  | <i>Wdr46</i>  |
| 1438709_at   | 0.6  | <i>Wipi1</i>  |
| 1419015_at   | -2.8 | <i>Wisp2</i>  |
| 1436746_at   | -0.6 | <i>Wnk1</i>   |
| 1441687_at   | -1   | <i>Wnt4</i>   |
| 1450782_at   | -0.5 | <i>Wnt4</i>   |
| 1448818_at   | -1.2 | <i>Wnt5a</i>  |
| 1451006_at   | 0.9  | <i>Xdh</i>    |
| 1456088_at   | -1   | <i>Xiap</i>   |
| 1427262_at   | -1.7 | <i>Xist</i>   |
| 1420357_s_at | 1.4  | <i>Xlr3a</i>  |
| 1449347_a_at | 0.5  | <i>Xlr4b</i>  |
| 1422532_at   | -0.6 | <i>Xpc</i>    |
| 1421054_at   | -0.6 | <i>Xpo4</i>   |
| 1428560_at   | 0.5  | <i>Xpo5</i>   |
| 1435672_at   | -1.1 | <i>Xylt1</i>  |
| 1441485_at   | -1.3 | <i>Yipf6</i>  |
| 1434277_a_at | -0.9 | <i>Ypel2</i>  |
| 1454901_at   | -0.7 | <i>Ypel2</i>  |
| 1455815_a_at | 0.2  | <i>Ywhab</i>  |

|              |      |                |
|--------------|------|----------------|
| 1436783_x_at | 0.3  | <i>Ywhab</i>   |
| 1426385_x_at | 0.2  | <i>Ywhae</i>   |
| 1438839_a_at | 0.2  | <i>Ywhae</i>   |
| 1416004_at   | 0.2  | <i>Ywhah</i>   |
| 1420829_a_at | -0.4 | <i>Ywhaq</i>   |
| 1416102_at   | 0.2  | <i>Ywhaz</i>   |
| 1436971_x_at | 0.2  | <i>Ywhaz</i>   |
| 1448218_s_at | 0.4  | <i>Ywhaz</i>   |
| 1429947_a_at | 1.6  | <i>Zbp1</i>    |
| 1454826_at   | -0.4 | <i>Zbtb11</i>  |
| 1442025_a_at | 0.6  | <i>Zbtb16</i>  |
| 1437066_at   | -1.1 | <i>Zbtb20</i>  |
| 1443471_at   | -0.9 | <i>Zbtb20</i>  |
| 1437598_at   | -0.5 | <i>Zbtb20</i>  |
| 1448705_at   | 0.4  | <i>Zbtb22</i>  |
| 1429722_at   | -0.6 | <i>Zbtb4</i>   |
| 1435397_at   | -0.5 | <i>Zbtb44</i>  |
| 1427877_at   | -0.3 | <i>Zc3h15</i>  |
| 1439033_at   | -0.8 | <i>Zcchc7</i>  |
| 1437616_x_at | -1   | <i>Zdhhc14</i> |
| 1429488_at   | -0.6 | <i>Zdhhc21</i> |
| 1444231_at   | -2.2 | <i>Zdhhc6</i>  |
| 1415940_at   | -0.5 | <i>Zfand2a</i> |
| 1422031_a_at | -0.8 | <i>Zfand6</i>  |
| 1449947_s_at | -0.3 | <i>Zfhx3</i>   |
| 1437556_at   | -1   | <i>Zfhx4</i>   |
| 1417792_at   | -0.7 | <i>Zfml</i>    |
| 1458515_at   | -1.3 | <i>Zfp128</i>  |
| 1436217_at   | -0.7 | <i>Zfp148</i>  |
| 1457285_at   | -0.5 | <i>Zfp187</i>  |
| 1434752_at   | -1.3 | <i>Zfp207</i>  |
| 1438714_at   | -1   | <i>Zfp207</i>  |
| 1455092_at   | -0.5 | <i>Zfp207</i>  |
| 1453034_at   | -0.9 | <i>Zfp251</i>  |
| 1427831_s_at | -0.9 | <i>Zfp260</i>  |
| 1419164_at   | -0.8 | <i>Zfp260</i>  |
| 1419165_at   | -0.5 | <i>Zfp260</i>  |
| 1457455_at   | -0.6 | <i>Zfp280d</i> |
| 1426377_at   | 0.4  | <i>Zfp281</i>  |
| 1452374_at   | -0.6 | <i>Zfp322a</i> |
| 1451216_at   | 0.2  | <i>Zfp330</i>  |
| 1453039_at   | -0.5 | <i>Zfp335</i>  |
| 1439979_at   | -0.8 | <i>Zfp398</i>  |
| 1427254_at   | -0.7 | <i>Zfp445</i>  |
| 1419564_at   | -1.1 | <i>Zfp467</i>  |
| 1441727_s_at | -0.9 | <i>Zfp467</i>  |
| 1423835_at   | -0.8 | <i>Zfp503</i>  |

|              |      |               |
|--------------|------|---------------|
| 1445201_at   | -1.2 | Zfp53         |
| 1454951_at   | -0.9 | Zfp606        |
| 1440226_at   | -1   | Zfp760        |
| 1437892_at   | -1   | Zkscan3       |
| 1435829_at   | -0.9 | Zmat1         |
| 1441823_at   | -0.6 | Zmiz1         |
| 1438460_at   | -1.2 | Znym4         |
| 1455290_at   | -1.1 | Znrf2         |
| 1455817_x_at | -1.1 | Zxdb          |
| 1417240_at   | 0.4  | Zyx           |
| 1418083_at   | -0.5 | 0610009B22Rik |
| 1456660_a_at | -0.5 | 0610010F05Rik |
| 1431126_a_at | -0.7 | 0610011F06Rik |
| 1434771_at   | -0.6 | 0610011F06Rik |
| 1423829_at   | 0.5  | 0910001A06Rik |
| 1434214_at   | 0.3  | 0910001L09Rik |
| 1437451_at   | 0.6  | 1110006O17Rik |
| 1436213_a_at | -0.8 | 1110028C15Rik |
| 1455602_x_at | -0.6 | 1110028C15Rik |
| 1416805_at   | -0.6 | 1110032E23Rik |
| 1455288_at   | -0.7 | 1110036O03Rik |
| 1451313_a_at | -1.1 | 1110067D22Rik |
| 1424318_at   | -0.8 | 1110067D22Rik |
| 1433581_at   | -0.6 | 1190002N15Rik |
| 1433582_at   | -0.5 | 1190002N15Rik |
| 1424524_at   | 0.5  | 1200002N14Rik |
| 1424106_at   | -0.4 | 1200003C05Rik |
| 1454998_at   | 0.5  | 1200011I18Rik |
| 1436761_s_at | -0.9 | 1200015N20Rik |
| 1448557_at   | -0.8 | 1200015N20Rik |
| 1455376_at   | -1.1 | 1300010F03Rik |
| 1447537_at   | -0.6 | 1500032P08Rik |
| 1436424_at   | -0.8 | 1600020E01Rik |
| 1423933_a_at | 1.7  | 1600029D21Rik |
| 1437150_at   | -1.3 | 1700012H17Rik |
| 1428411_at   | -0.5 | 1700020I14Rik |
| 1437774_at   | -0.5 | 1700020I14Rik |
| 1436431_at   | 0.8  | 1700025G04Rik |
| 1428593_at   | 0.5  | 1700029F09Rik |
| 1438979_s_at | -0.8 | 1700029I15Rik |
| 1430190_at   | 1    | 1700041C02Rik |
| 1430886_at   | -1   | 1700112E06Rik |
| 1435595_at   | -1.4 | 1810011O10Rik |
| 1451415_at   | -1.2 | 1810011O10Rik |
| 1440234_at   | -0.9 | 1810012P15Rik |
| 1417797_a_at | -1.3 | 1810019J16Rik |
| 1417174_at   | 0.4  | 1810021J13Rik |

|              |      |               |
|--------------|------|---------------|
| 1436523_s_at | 0.4  | 1810022K09Rik |
| 1452008_at   | 0.8  | 1810054D07Rik |
| 1452009_at   | 0.8  | 1810054D07Rik |
| 1440192_at   | 1.3  | 1810054D07Rik |
| 1425921_a_at | 0.6  | 1810055G02Rik |
| 1451283_at   | -0.6 | 1810073G14Rik |
| 1423306_at   | 0.3  | 2010002N04Rik |
| 1434175_s_at | -0.9 | 2210010N04Rik |
| 1428331_at   | 0.4  | 2210016F16Rik |
| 1430637_at   | -1   | 2210016H18Rik |
| 1451409_at   | -0.6 | 2210021J22Rik |
| 1429637_at   | -1.2 | 2210419I08Rik |
| 1452159_at   | -0.6 | 2310001A20Rik |
| 1453173_at   | 0.3  | 2310005E10Rik |
| 1428619_at   | -0.7 | 2310005N03Rik |
| 1424016_at   | -1.1 | 2310007F21Rik |
| 1428083_at   | -0.5 | 2310043N10Rik |
| 1429505_at   | -0.5 | 2310076G13Rik |
| 1441915_s_at | -1.5 | 2310076L09Rik |
| 1424937_at   | -1.4 | 2310076L09Rik |
| 1438034_at   | -1.5 | 2410005O16Rik |
| 1457999_at   | -1.2 | 2410005O16Rik |
| 1454047_a_at | -1   | 2410017P07Rik |
| 1433872_at   | 0.2  | 2410042D21Rik |
| 1427904_s_at | -0.5 | 2410091C18Rik |
| 1432651_at   | -0.8 | 2510019K15Rik |
| 1428561_at   | -0.6 | 2610002J23Rik |
| 1429556_at   | 0.3  | 2610024B07Rik |
| 1417921_at   | 0.4  | 2610029G23Rik |
| 1438429_at   | -1   | 2610319H10Rik |
| 1428921_at   | -1   | 2810021B07Rik |
| 1427349_x_at | -0.8 | 2810021G02Rik |
| 1416445_at   | 0.4  | 2810405J04Rik |
| 1423266_at   | -0.8 | 2810405K02Rik |
| 1453726_s_at | -0.4 | 2810407C02Rik |
| 1419153_at   | 0.5  | 2810417H13Rik |
| 1428333_at   | 0.4  | 2900062L11Rik |
| 1416892_s_at | 0.4  | 3110001A13Rik |
| 1426964_at   | 0.3  | 3110003A17Rik |
| 1439932_at   | -0.9 | 3110003A22Rik |
| 1449122_at   | -0.6 | 3110003A22Rik |
| 1444169_at   | -1.3 | 3110052M02Rik |
| 1453668_at   | -1.3 | 3110052M02Rik |
| 1440992_at   | -0.8 | 3110052M02Rik |
| 1429771_at   | -0.5 | 3110073H01Rik |
| 1436035_at   | -1.3 | 3830431G21Rik |
| 1442155_at   | -1.4 | 4632427E13Rik |

|              |      |               |
|--------------|------|---------------|
| 1429331_at   | -1.1 | 4632427E13Rik |
| 1434566_a_at | -0.7 | 4732496O08Rik |
| 1457751_at   | -0.4 | 4832420A03Rik |
| 1433831_at   | -0.6 | 4833418A01Rik |
| 1448100_at   | -0.5 | 4833439L19Rik |
| 1445862_at   | -1   | 4921513D23Rik |
| 1456165_at   | -1.5 | 4921521F21Rik |
| 1454136_a_at | -0.4 | 4921524J17Rik |
| 1434480_at   | -0.9 | 4930402E16Rik |
| 1451653_a_at | 1.4  | 4930430E16Rik |
| 1433978_at   | -0.3 | 4930430F08Rik |
| 1430051_at   | -1.2 | 4930486L24Rik |
| 1454701_at   | -0.5 | 4930503L19Rik |
| 1429055_at   | -0.8 | 4930506M07Rik |
| 1458667_at   | -0.8 | 4930519N13Rik |
| 1434817_s_at | 0.6  | 4930535B03Rik |
| 1420774_a_at | -0.4 | 4930583H14Rik |
| 1438798_at   | -0.6 | 4931406P16Rik |
| 1456711_at   | 1.2  | 4932425I24Rik |
| 1427016_at   | -0.6 | 4932438A13Rik |
| 1440851_at   | -0.9 | 4933407N01Rik |
| 1428162_at   | -0.9 | 4933421E11Rik |
| 1435353_a_at | -0.9 | 4933439C20Rik |
| 1439069_a_at | -0.9 | 4933439C20Rik |
| 1426387_x_at | -0.6 | 4933439C20Rik |
| 1436944_x_at | -0.6 | 4933439C20Rik |
| 1434975_x_at | -0.5 | 4933439C20Rik |
| 1430023_at   | 0.4  | 5133400G04Rik |
| 1428663_at   | -0.5 | 5133401H06Rik |
| 1429900_at   | -0.6 | 5330406M23Rik |
| 1427063_at   | -2.6 | 5330417C22Rik |
| 1428796_at   | -0.6 | 5530401J07Rik |
| 1428948_at   | -1.6 | 5730414M22Rik |
| 1456419_at   | -0.6 | 5730455P16Rik |
| 1452716_at   | 0.2  | 5730469M10Rik |
| 1452773_at   | -0.5 | 5730494N06Rik |
| 1436389_at   | -0.6 | 5730596K20Rik |
| 1434084_at   | -0.7 | 5730601F06Rik |
| 1428748_at   | -1.1 | 5830428H23Rik |
| 1453698_at   | -2.1 | 6030451C04Rik |
| 1441972_at   | -0.6 | 6230424C14Rik |
| 1455538_at   | -0.6 | 6330403M23Rik |
| 1426315_a_at | 0.6  | 6330416G13Rik |
| 1435849_at   | -0.8 | 6330417G02Rik |
| 1454897_at   | -0.8 | 6330509M05Rik |
| 1437421_at   | -0.7 | 6330509M05Rik |
| 1457218_at   | -0.7 | 6430510M02Rik |

|              |      |               |
|--------------|------|---------------|
| 1436948_a_at | 0.9  | 6430550H21Rik |
| 1425319_s_at | -0.7 | 6530403A03Rik |
| 1423072_at   | -1.3 | 6720475J19Rik |
| 1429882_at   | -1.5 | 6820431F20Rik |
| 1457673_at   | -0.8 | 6820431F20Rik |
| 1428284_at   | -1   | 8430427H17Rik |
| 1431007_at   | -0.5 | 9030025P20Rik |
| 1429846_at   | -1   | 9030411K21Rik |
| 1418879_at   | 0.4  | 9030611O19Rik |
| 1435163_at   | -1   | 9030612M13Rik |
| 1453140_at   | -0.7 | 9030612M13Rik |
| 1428891_at   | 0.3  | 9130213B05Rik |
| 1452215_at   | 0.3  | 9130401M01Rik |
| 1438299_at   | -1.6 | 9230108I15Rik |
| 1457671_at   | -1.4 | 9330120H11Rik |
| 1460121_at   | -1.1 | 9630010G10Rik |
| 1429987_at   | -0.8 | 9930013L23Rik |
| 1435695_a_at | 0.5  | A030007L17Rik |
| 1418100_at   | -1.1 | A030009H04Rik |
| 1440671_at   | -1.7 | A130012E19Rik |
| 1428909_at   | 0.3  | A130040M12Rik |
| 1439450_x_at | -0.7 | A230046K03Rik |
| 1427319_at   | -0.6 | A230046K03Rik |
| 1442580_at   | -0.9 | A530020G20Rik |
| 1455508_at   | -1   | A530082C11Rik |
| 1437127_at   | -0.5 | A630033E08Rik |
| 1437253_at   | -0.5 | A630054L15Rik |
| 1455554_at   | -0.9 | A830039N20Rik |
| 1439514_at   | -1.1 | A930004D18Rik |
| 1435266_at   | -1.3 | A930041I02Rik |

---
