# Supplementary material
Source: PubMed Central journal article supplement (PMC2765067)
Supplement: tableS3.pdf [file tableS3.pdf]

Table B. Microarray expression of tight junction associated genes in cavernosal endothelial cells relative to coronary artery and umbilical vein

|                         | Gene Name                     | vs. HCA         | vs. HUV |      |
|-------------------------|-------------------------------|-----------------|---------|------|
| Claudins                | <i>CLDN 1</i>                 | 1.88            | 1.95    |      |
|                         | <i>CLDN 3</i>                 | 1.02            | 1       |      |
|                         | <i>CLDN 4</i>                 | 1               | 1.04    |      |
|                         | <i>CLDN 5 *</i>               | -2.16           | -2.21   |      |
|                         | <i>CLDN 6</i>                 | 1               | 1.22    |      |
|                         | <i>CLDN 7</i>                 | -1.76           | -1.63   |      |
|                         | <i>CLDN 8</i>                 | 1               | 1       |      |
|                         | <i>CLDN 9</i>                 | 1.02            | 1.02    |      |
|                         | <i>CLDN 10</i>                | -1.07           | 1.03    |      |
|                         | <i>CLDN 11*</i>               | 5.03            | 4.42    |      |
|                         | <i>CLDN 14</i>                | -1.18           | 1.1     |      |
|                         | <i>CLDN 15</i>                | 1.01            | 1.08    |      |
|                         | <i>CLDN 16</i>                | 1.27            | 1.31    |      |
|                         | <i>CLDN 17</i>                | 1.21            | 1.21    |      |
|                         | <i>CLDN 18</i>                | 1.18            | 1.13    |      |
|                         | Occludin                      | <i>Occludin</i> | 1.14    | 1    |
|                         | Junctional Adhesion Molecules | <i>JAM 2</i>    | 2.55    | 1.31 |
|                         |                               | <i>JAM 3</i>    | 1.14    | 1.32 |
| Tight Junction Proteins | <i>ZO1</i>                    | 1.06            | 1.06    |      |
|                         | <i>ZO2</i>                    | -1.13           | 1.26    |      |
|                         | <i>ZO3</i>                    | -1.08           | -1.08   |      |
