# Supplementary material
Source: PubMed Central journal article supplement (PMC2765067)
Supplement: tableS4.pdf [file tableS4.pdf]

1: GDS1543 record | GPL96 206908\_s\_at [Homo sapiens] 6 samples  
Annotation: CLDN11: claudin 11 (oligodendrocyte transmembrane protein) OSP, OTM  
Reporter: NM\_005602  
Experiment: Tumor necrosis factor effect on microvascular endothelial cells, gene expression array-based, count

2: GDS1542 record | GPL96 206908\_s\_at [Homo sapiens] 8 samples  
Annotation: CLDN11: claudin 11 (oligodendrocyte transmembrane protein) OSP, OTM  
Reporter: NM\_005602  
Experiment: Tumor necrosis factor effect on macrovascular umbilical vein endothelial cells, gene expression array-based, count

3: GDS1257 record | GPL96 206908\_s\_at [Homo sapiens] 33 samples  
Annotation: CLDN11: claudin 11 (oligodendrocyte transmembrane protein) OSP, OTM  
Reporter: NM\_005602  
Experiment: Sick cell plasma effect on pulmonary artery endothelial cells (HG-U133A), gene expression array-based, count

4: GDS1258 record | GPL97 228335\_at [Homo sapiens] 32 samples  
Annotation: CLDN11: Claudin 11 (oligodendrocyte transmembrane protein)  
Reporter: AW264204  
Experiment: Sick cell plasma effect on pulmonary artery endothelial cells (HG-U133B), gene expression array-based, count

5: GDS1973 record | GPL570 228335\_at [Homo sapiens] 20 samples  
Annotation: CLDN11: Claudin 11 (oligodendrocyte transmembrane protein)  
Reporter: AW264204  
Experiment: Various prostate cell types, gene expression array-based, count

6: GDS1317 record | GPL96 206908\_s\_at [Homo sapiens] 8 samples  
Annotation: CLDN11: claudin 11 (oligodendrocyte transmembrane protein) OSP, OTM  
Reporter: NM\_005602  
Experiment: Umbilical vein endothelial cell response to shear stress and intraluminal pressure, gene expression array-based, count

7: GDS1973 record | GPL570 206908\_s\_at [Homo sapiens] 20 samples  
Annotation: CLDN11: claudin 11 (oligodendrocyte transmembrane protein) OSP, OTM  
Reporter: NM\_005602  
Experiment: Various prostate cell types, gene expression array-based, count

8: GDS2009 record | GPL97 228335\_at [Homo sapiens] 7 samples  
Annotation: CLDN11: Claudin 11 (oligodendrocyte transmembrane protein)  
Reporter: AW264204  
Experiment: Sustained EGR1 expression in endothelial cells: time course (HG-U133B), gene expression array-based, count

9: GDS2008 record | GPL96 206908\_s\_at [Homo sapiens] 7 samples  
Annotation: CLDN11: claudin 11 (oligodendrocyte transmembrane protein) OSP, OTM  
Reporter: NM\_005602  
Experiment: Sustained EGR1 expression in endothelial cells: time course (HG-U133A), gene expression array-based, count

10: GDS2040 record | GPL97 228335\_at [Homo sapiens] 10 samples  
Annotation: CLDN11: Claudin 11 (oligodendrocyte transmembrane protein)  
Reporter: AW264204  
Experiment: Endothelial cell morphogenesis (HG-U133B), gene expression array-based, count

11: GDS2039 record | GPL96 206908\_s\_at [Homo sapiens] 10 samples  
Annotation: CLDN11: claudin 11 (oligodendrocyte transmembrane protein) OSP, OTM  
Reporter: NM\_005602  
Experiment: Endothelial cell morphogenesis (HG-U133A), gene expression array-based, count

12: GDS1402 record | GPL1449 251793.1\_PROBE1 [Homo sapiens] 61 samples  
Annotation: CLDN11: claudin 11 (oligodendrocyte transmembrane protein) OSP, OTM  
Reporter: BC013577  
Experiment: Various normal pure cell cultures, gene expression array-based, count

13: GDS1630 record | GPL96 206908\_s\_at [Homo sapiens] 16 samples  
Annotation: CLDN11: claudin 11 (oligodendrocyte transmembrane protein) OSP, OTM  
Reporter: NM\_005602  
Experiment: Immortalized endothelial cell line response to atorvastatin, gene expression array-based, count

14: GDS1402 record | GPL1449 NM\_005602.3\_PROBE1 [Homo sapiens] 61 samples  
Annotation: CLDN11: claudin 11 (oligodendrocyte transmembrane protein) OSP, OTM  
Reporter: NM\_005602  
Experiment: Various normal pure cell cultures, gene expression array-based, count

15: GDS649 record | GPL96 206908\_s\_at [Homo sapiens] 5 samples  
Annotation: CLDN11: claudin 11 (oligodendrocyte transmembrane protein) OSP, OTM  
Reporter: NM\_005602  
Experiment: Inflammatory response of interleukin-1-stimulated endothelial cells, gene expression array-based, count
