# Supplementary material
Source: PubMed Central journal article supplement (PMC2765067)

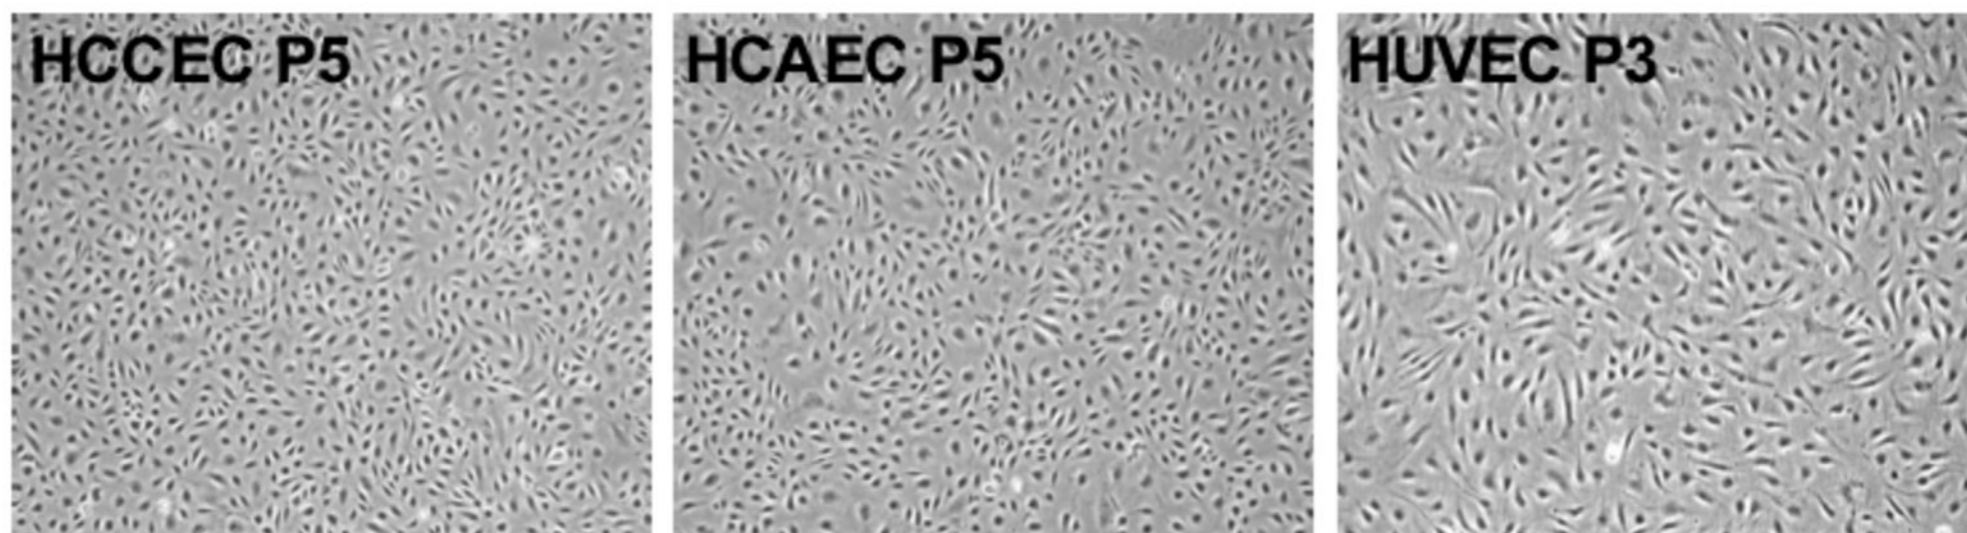

**Supplement Figure A**

Supplement: figS1.pdf [file figS1.pdf]

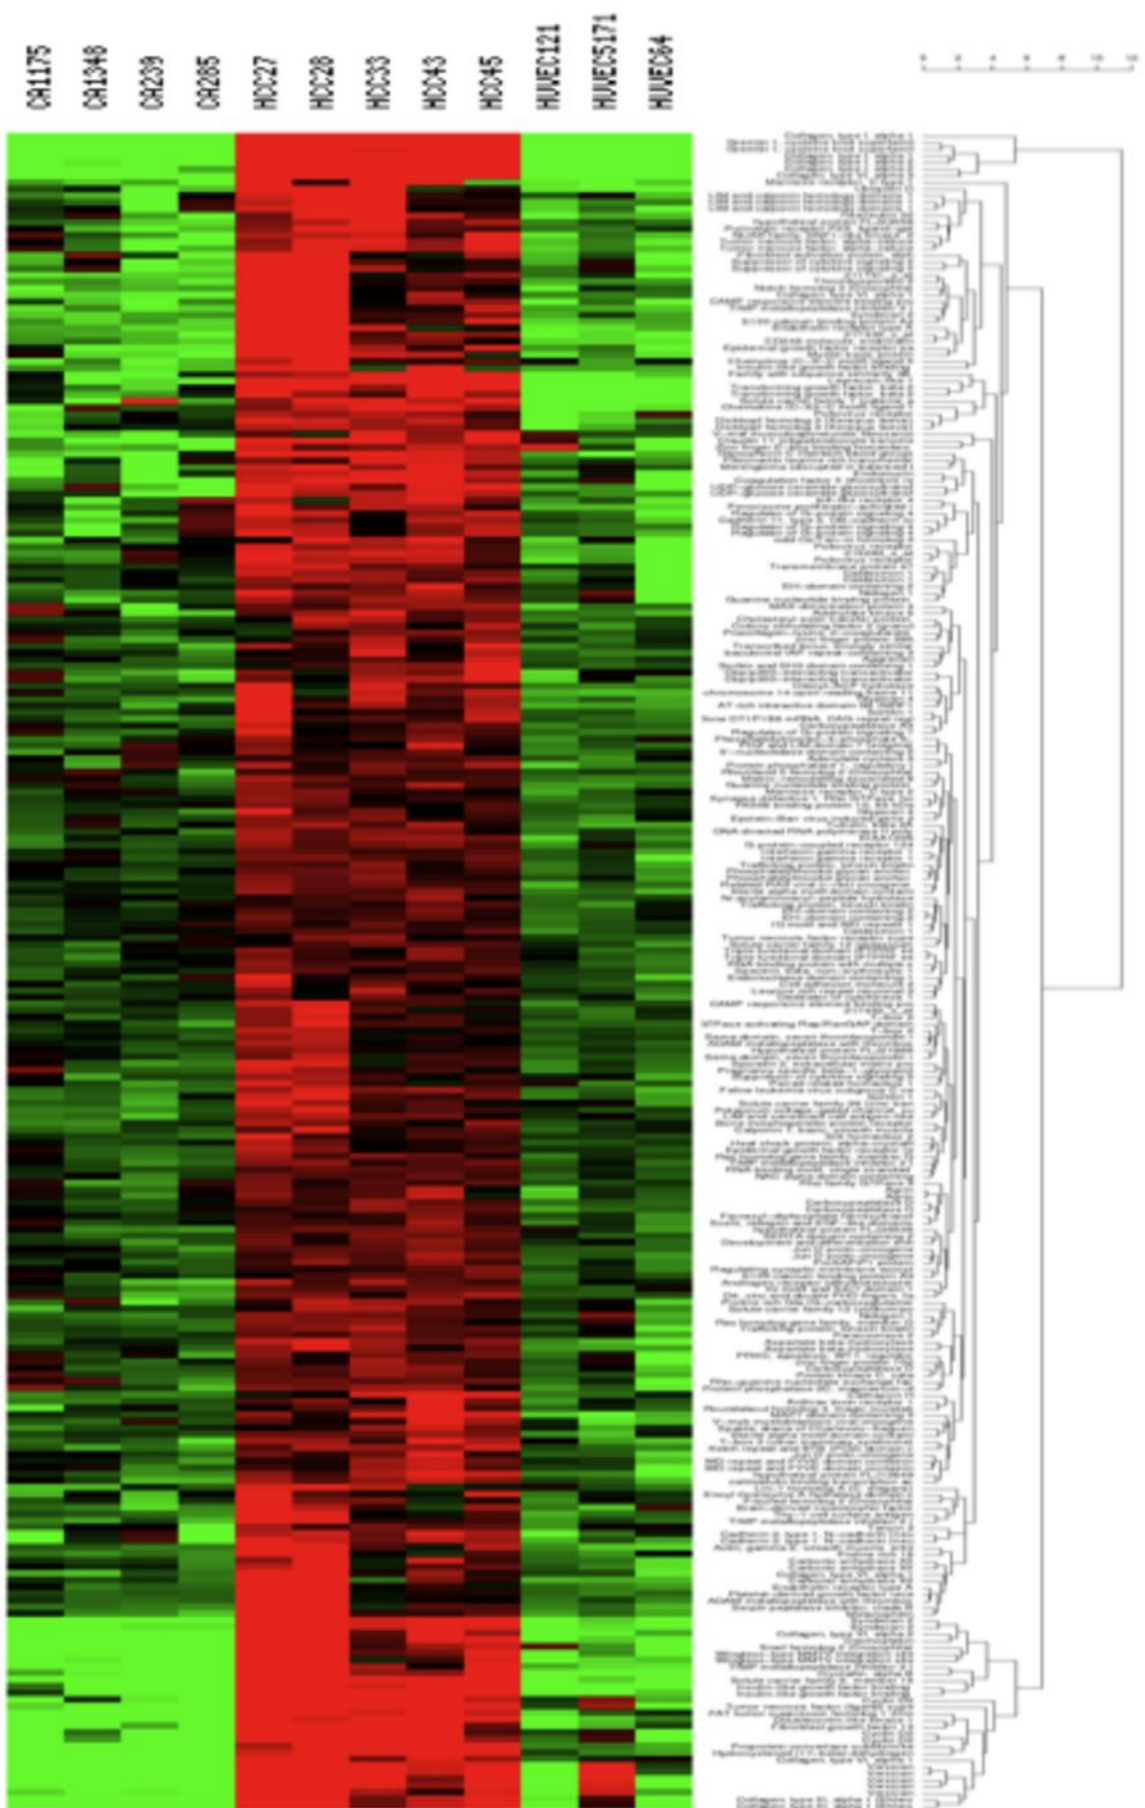

**SUPPLEMENT FIGURE B**

Supplement: figS2.pdf [file figS2.pdf]
